# Supplementary material for: Diversity of individual mobility patterns and emergence of aggregated scaling laws
Source: PubMed Central journal article supplement (PMC3776193; doi:10.1038/srep02678), 2013-09-18
Supplement: srep02678-s1.pdf [file srep02678-s1.pdf]

# Supporting Information

## Diversity of Individual Mobility Patterns and Emergence of Aggregated Scaling Laws

Xiao-Yong Yan, Xiao-Pu Han, Bing-Hong Wang, and Tao Zhou

Table S1: Mobility patterns of 230 individuals. In mobility networks, nodes may be too close to be distinguished in geographic view, we therefore draw another version of mobility network in a circular layout by putting the most frequently visited node of a network at the center and ignoring the geolocations.

| Individual ID                                         | Displacement distribution | Mobility network<br>(with geolocation) | Mobility network<br>(without geolocation) |
|-------------------------------------------------------|---------------------------|----------------------------------------|-------------------------------------------|
| ID: 1<br>Status: Housemaker<br>Sex: Female<br>Age: 44 |                           |                                        |                                           |
| ID: 2<br>Status: Employed<br>Sex: Female<br>Age: 58   |                           |                                        |                                           |
| ID: 3<br>Status: Employed<br>Sex: Male<br>Age: 58     |                           |                                        |                                           |
| ID: 4<br>Status: Unknow<br>Sex: Female<br>Age: 64     |                           |                                        |                                           |

TABLE S1 (continued)

| Individual ID                                                 | Displacement distribution | Mobility network<br>(with geolocation) | Mobility network<br>(without geolocation) |
|---------------------------------------------------------------|---------------------------|----------------------------------------|-------------------------------------------|
| <p>ID: 5<br/>Status: Employed<br/>Sex: Male<br/>Age: 60</p>   |                           |                                        |                                           |
| <p>ID: 6<br/>Status: Unknow<br/>Sex: Male<br/>Age: 76</p>     |                           |                                        |                                           |
| <p>ID: 7<br/>Status: Employed<br/>Sex: Female<br/>Age: 49</p> |                           |                                        |                                           |
| <p>ID: 8<br/>Status: Employed<br/>Sex: Male<br/>Age: 50</p>   |                           |                                        |                                           |
| <p>ID: 9<br/>Status: Employed<br/>Sex: Male<br/>Age: 45</p>   |                           |                                        |                                           |
| <p>ID: 10<br/>Status: Pupil<br/>Sex: Female<br/>Age: 10</p>   |                           |                                        |                                           |

TABLE S1 (continued)

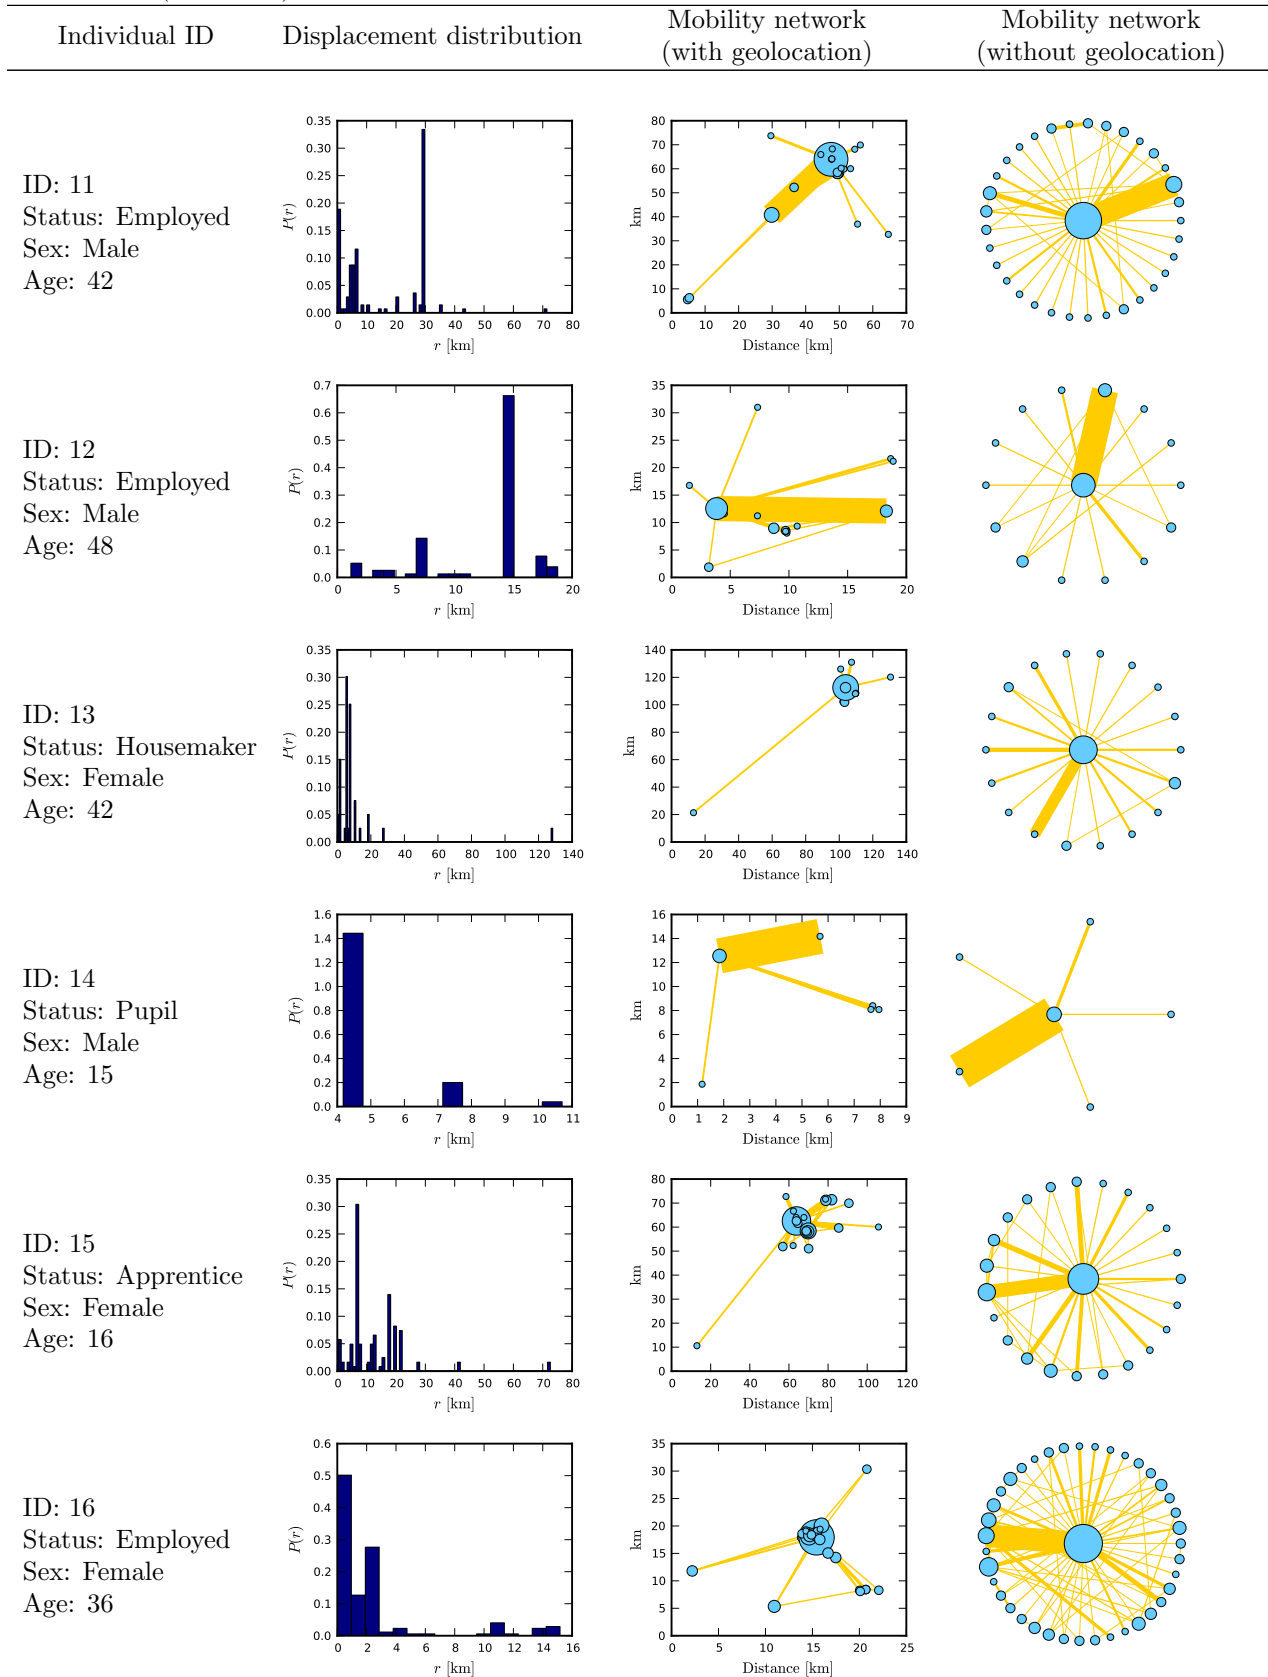

TABLE S1 (continued)

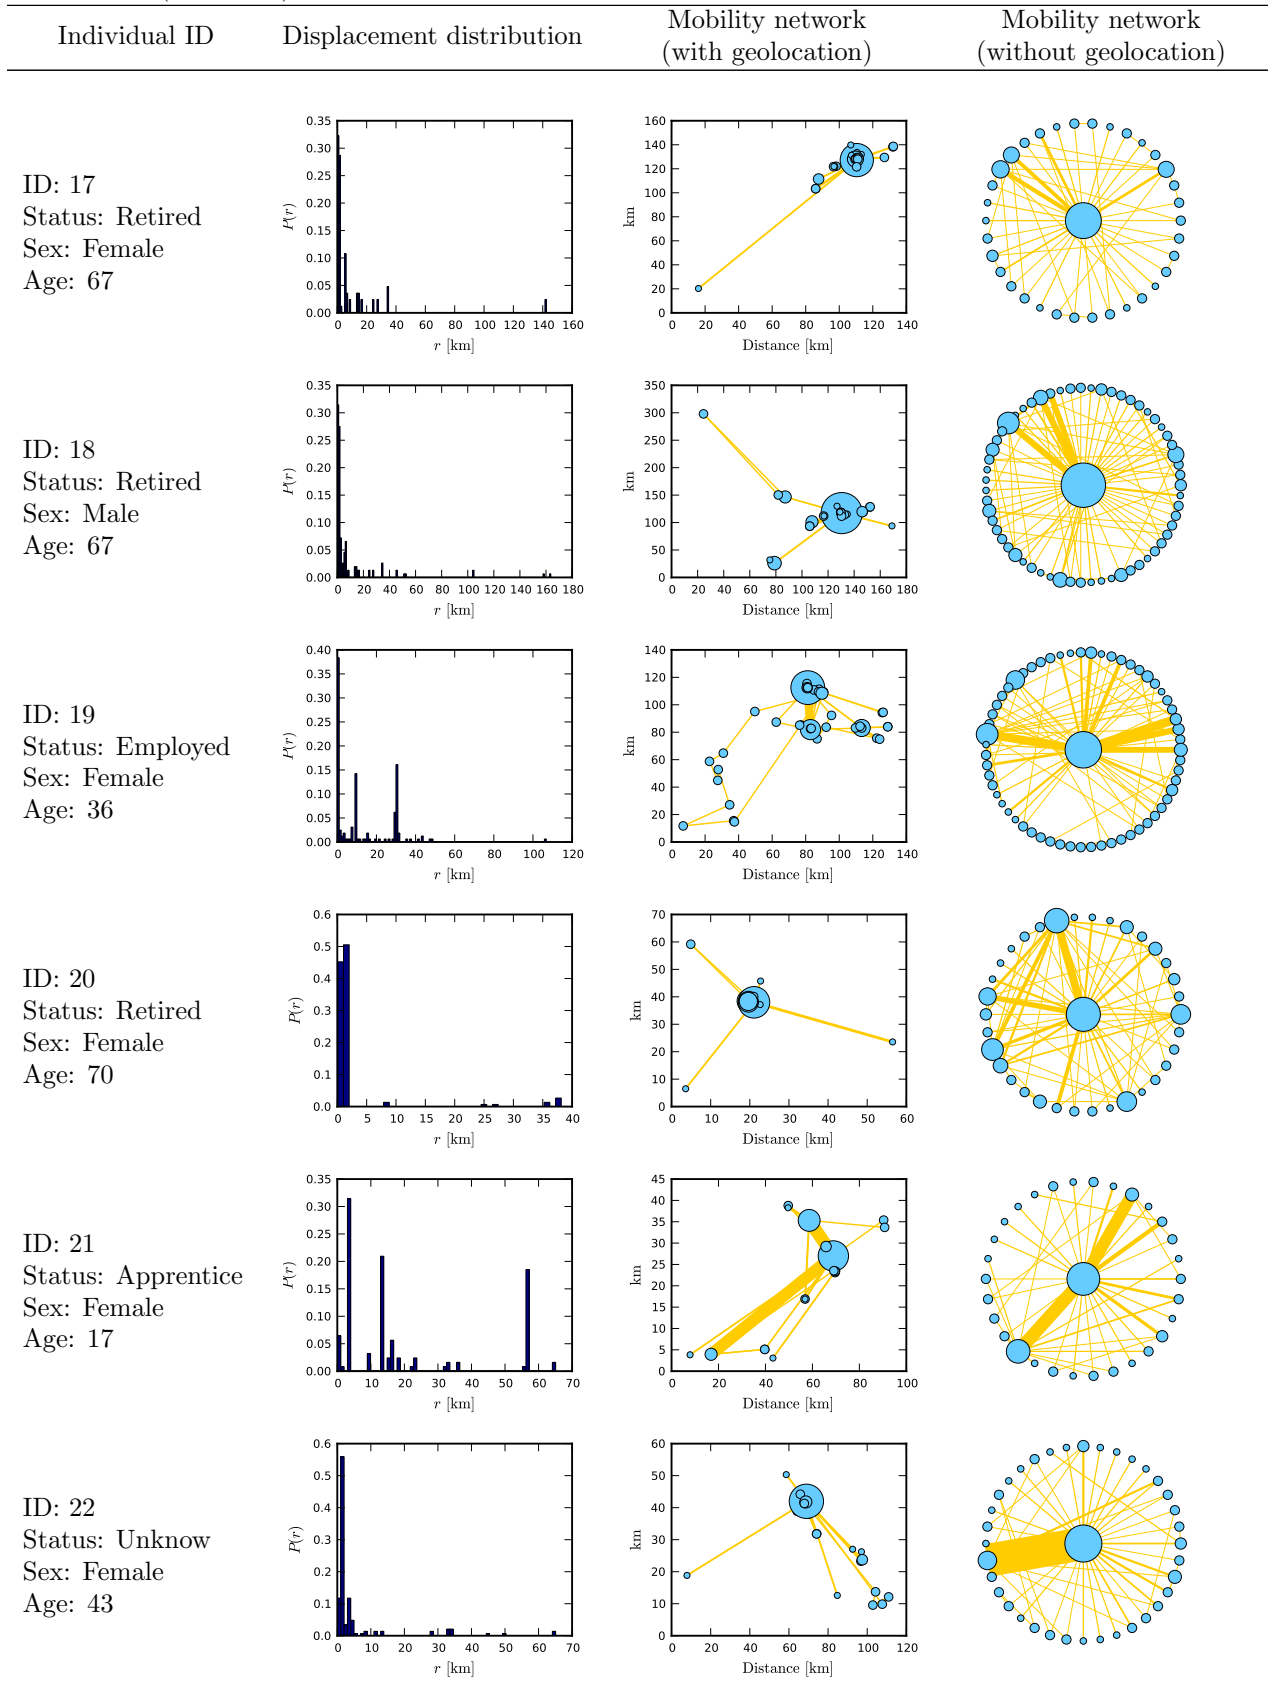

TABLE S1 (continued)

| Individual ID                                       | Displacement distribution | Mobility network<br>(with geolocation) | Mobility network<br>(without geolocation) |
|-----------------------------------------------------|---------------------------|----------------------------------------|-------------------------------------------|
| ID: 23<br>Status: Employed<br>Sex: Male<br>Age: 31  |                           |                                        |                                           |
| ID: 24<br>Status: Student<br>Sex: Female<br>Age: 30 |                           |                                        |                                           |
| ID: 25<br>Status: Employed<br>Sex: Male<br>Age: 46  |                           |                                        |                                           |
| ID: 26<br>Status: Retired<br>Sex: Male<br>Age: 68   |                           |                                        |                                           |
| ID: 27<br>Status: Employed<br>Sex: Male<br>Age: 51  |                           |                                        |                                           |
| ID: 28<br>Status: Employed<br>Sex: Male<br>Age: 32  |                           |                                        |                                           |

TABLE S1 (continued)

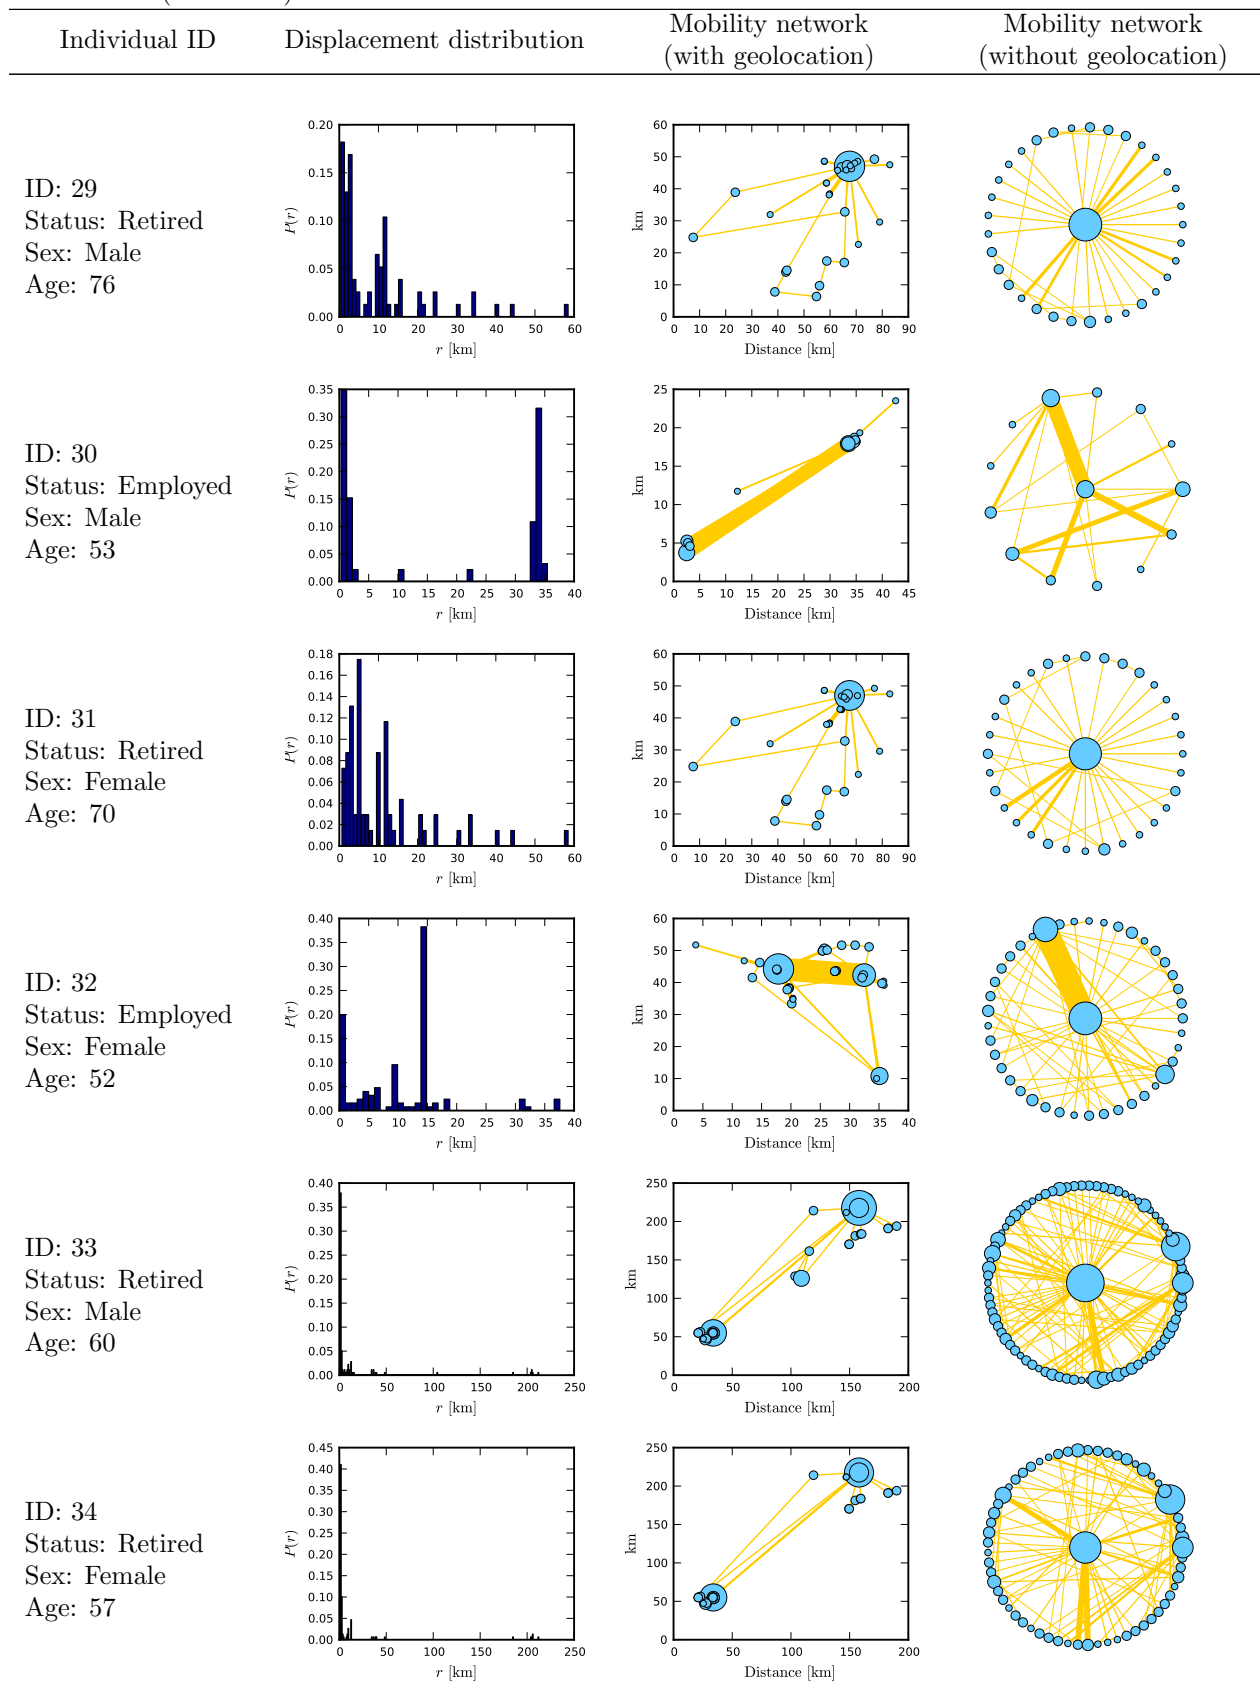

TABLE S1 (continued)

| Individual ID                                        | Displacement distribution | Mobility network<br>(with geolocation) | Mobility network<br>(without geolocation) |
|------------------------------------------------------|---------------------------|----------------------------------------|-------------------------------------------|
| ID: 35<br>Status: Employed<br>Sex: Female<br>Age: 39 |                           |                                        |                                           |
| ID: 36<br>Status: Employed<br>Sex: Male<br>Age: 47   |                           |                                        |                                           |
| ID: 37<br>Status: Employed<br>Sex: Female<br>Age: 31 |                           |                                        |                                           |
| ID: 38<br>Status: Employed<br>Sex: Male<br>Age: 32   |                           |                                        |                                           |
| ID: 39<br>Status: Employed<br>Sex: Male<br>Age: 56   |                           |                                        |                                           |
| ID: 40<br>Status: Student<br>Sex: Female<br>Age: 20  |                           |                                        |                                           |

TABLE S1 (continued)

| Individual ID                                                  | Displacement distribution | Mobility network<br>(with geolocation) | Mobility network<br>(without geolocation) |
|----------------------------------------------------------------|---------------------------|----------------------------------------|-------------------------------------------|
| <p>ID: 41<br/>Status: Employed<br/>Sex: Female<br/>Age: 23</p> |                           |                                        |                                           |
| <p>ID: 42<br/>Status: Unknown<br/>Sex: Male<br/>Age: 37</p>    |                           |                                        |                                           |
| <p>ID: 43<br/>Status: Unknown<br/>Sex: Female<br/>Age: 35</p>  |                           |                                        |                                           |
| <p>ID: 44<br/>Status: Unknown<br/>Sex: Female<br/>Age: 62</p>  |                           |                                        |                                           |
| <p>ID: 45<br/>Status: Student<br/>Sex: Male<br/>Age: 23</p>    |                           |                                        |                                           |
| <p>ID: 46<br/>Status: Employed<br/>Sex: Male<br/>Age: 61</p>   |                           |                                        |                                           |



TABLE S1 (continued)

| Individual ID                                          | Displacement distribution | Mobility network<br>(with geolocation) | Mobility network<br>(without geolocation) |
|--------------------------------------------------------|---------------------------|----------------------------------------|-------------------------------------------|
| ID: 47<br>Status: Pupil<br>Sex: Female<br>Age: 10      |                           |                                        |                                           |
| ID: 48<br>Status: Employed<br>Sex: Male<br>Age: 32     |                           |                                        |                                           |
| ID: 49<br>Status: Housemaker<br>Sex: Female<br>Age: 37 |                           |                                        |                                           |
| ID: 50<br>Status: Employed<br>Sex: Male<br>Age: 60     |                           |                                        |                                           |
| ID: 51<br>Status: Employed<br>Sex: Female<br>Age: 53   |                           |                                        |                                           |
| ID: 52<br>Status: Retired<br>Sex: Male<br>Age: 72      |                           |                                        |                                           |

TABLE S1 (continued)

| Individual ID                                                    | Displacement distribution | Mobility network<br>(with geolocation) | Mobility network<br>(without geolocation) |
|------------------------------------------------------------------|---------------------------|----------------------------------------|-------------------------------------------|
| <p>ID: 53<br/>Status: Retired<br/>Sex: Female<br/>Age: 70</p>    |                           |                                        |                                           |
| <p>ID: 54<br/>Status: Employed<br/>Sex: Male<br/>Age: 62</p>     |                           |                                        |                                           |
| <p>ID: 55<br/>Status: Employed<br/>Sex: Male<br/>Age: 53</p>     |                           |                                        |                                           |
| <p>ID: 56<br/>Status: Retired<br/>Sex: Female<br/>Age: 64</p>    |                           |                                        |                                           |
| <p>ID: 57<br/>Status: Pupil<br/>Sex: Male<br/>Age: 12</p>        |                           |                                        |                                           |
| <p>ID: 58<br/>Status: Housemaker<br/>Sex: Female<br/>Age: 69</p> |                           |                                        |                                           |

TABLE S1 (continued)

| Individual ID                                                    | Displacement distribution | Mobility network<br>(with geolocation) | Mobility network<br>(without geolocation) |
|------------------------------------------------------------------|---------------------------|----------------------------------------|-------------------------------------------|
| <p>ID: 59<br/>Status: Employed<br/>Sex: Male<br/>Age: 57</p>     |                           |                                        |                                           |
| <p>ID: 60<br/>Status: Employed<br/>Sex: Male<br/>Age: 56</p>     |                           |                                        |                                           |
| <p>ID: 61<br/>Status: Housemaker<br/>Sex: Female<br/>Age: 54</p> |                           |                                        |                                           |
| <p>ID: 62<br/>Status: Employed<br/>Sex: Male<br/>Age: 49</p>     |                           |                                        |                                           |
| <p>ID: 63<br/>Status: Pupil<br/>Sex: Male<br/>Age: 15</p>        |                           |                                        |                                           |
| <p>ID: 64<br/>Status: Unknow<br/>Sex: Male<br/>Age: 47</p>       |                           |                                        |                                           |

TABLE S1 (continued)

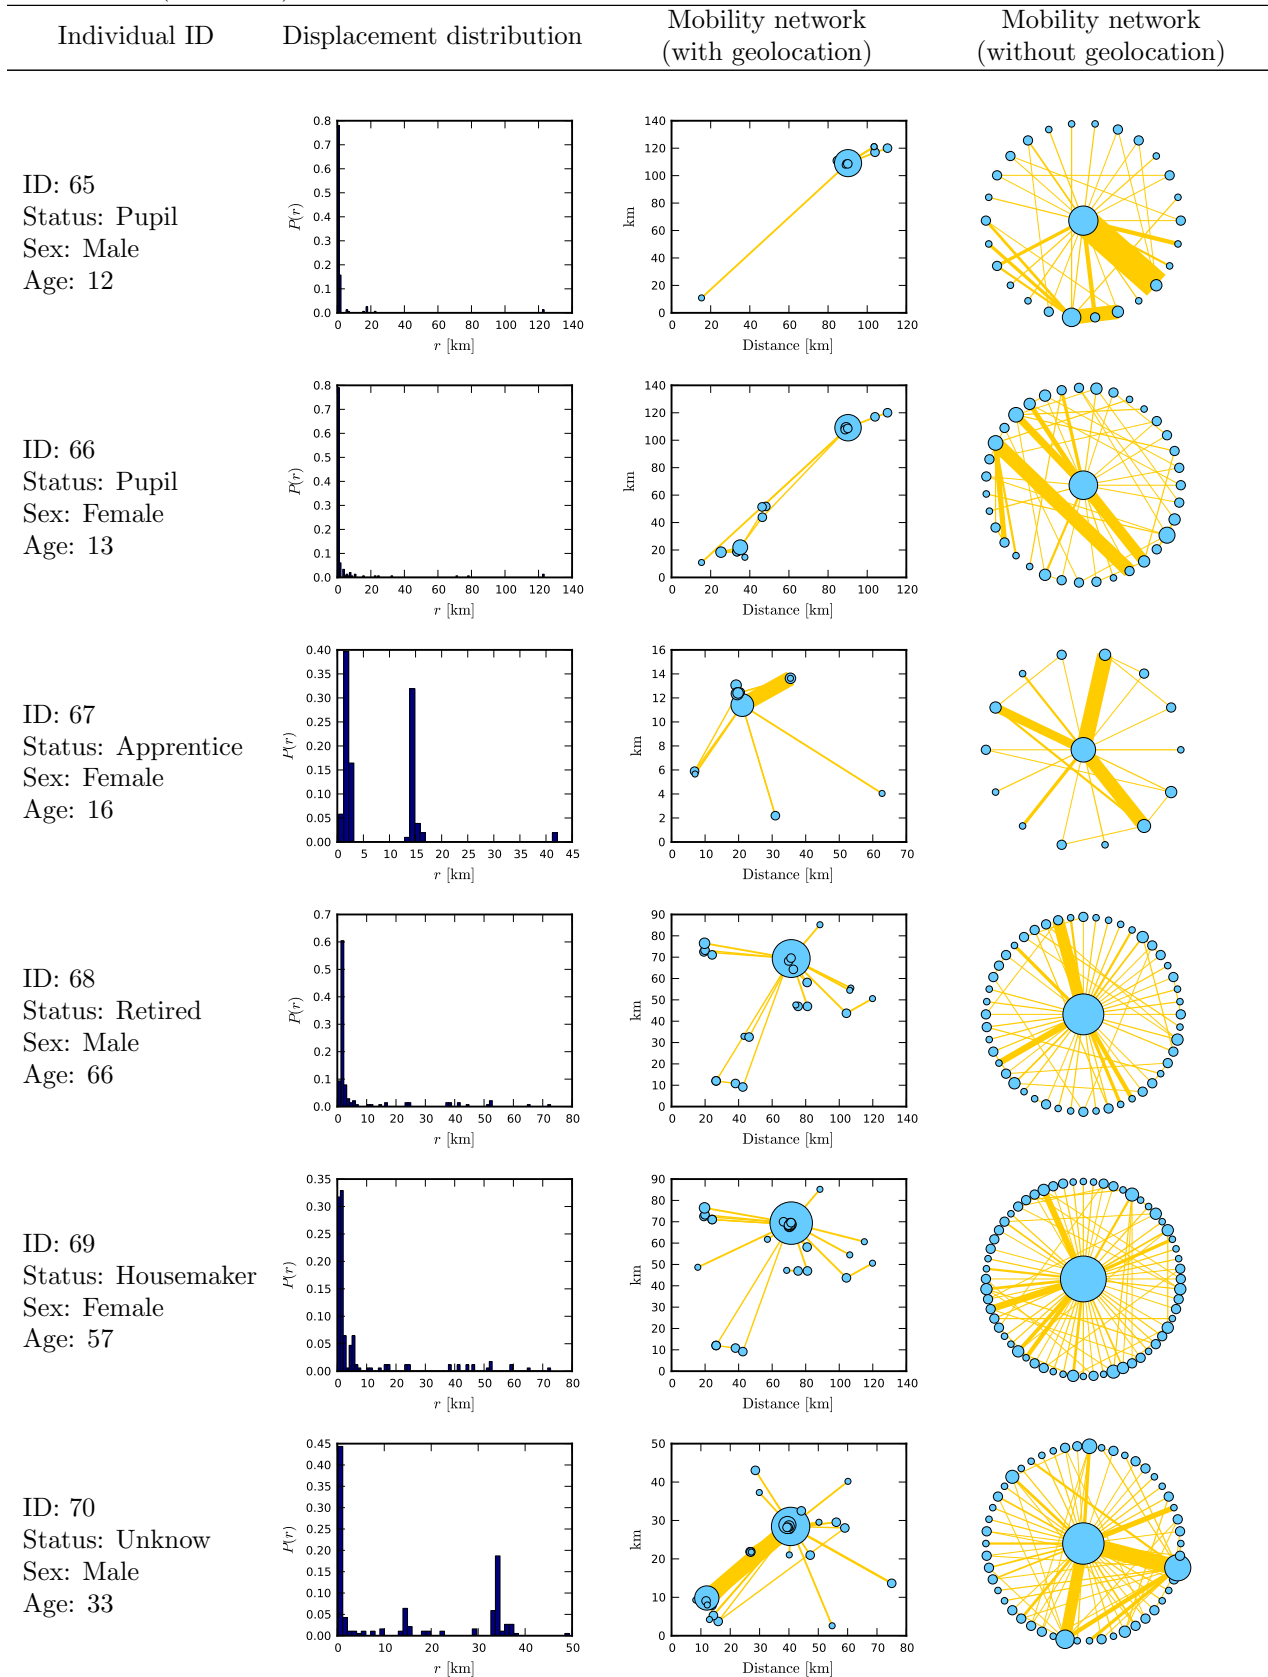

TABLE S1 (continued)

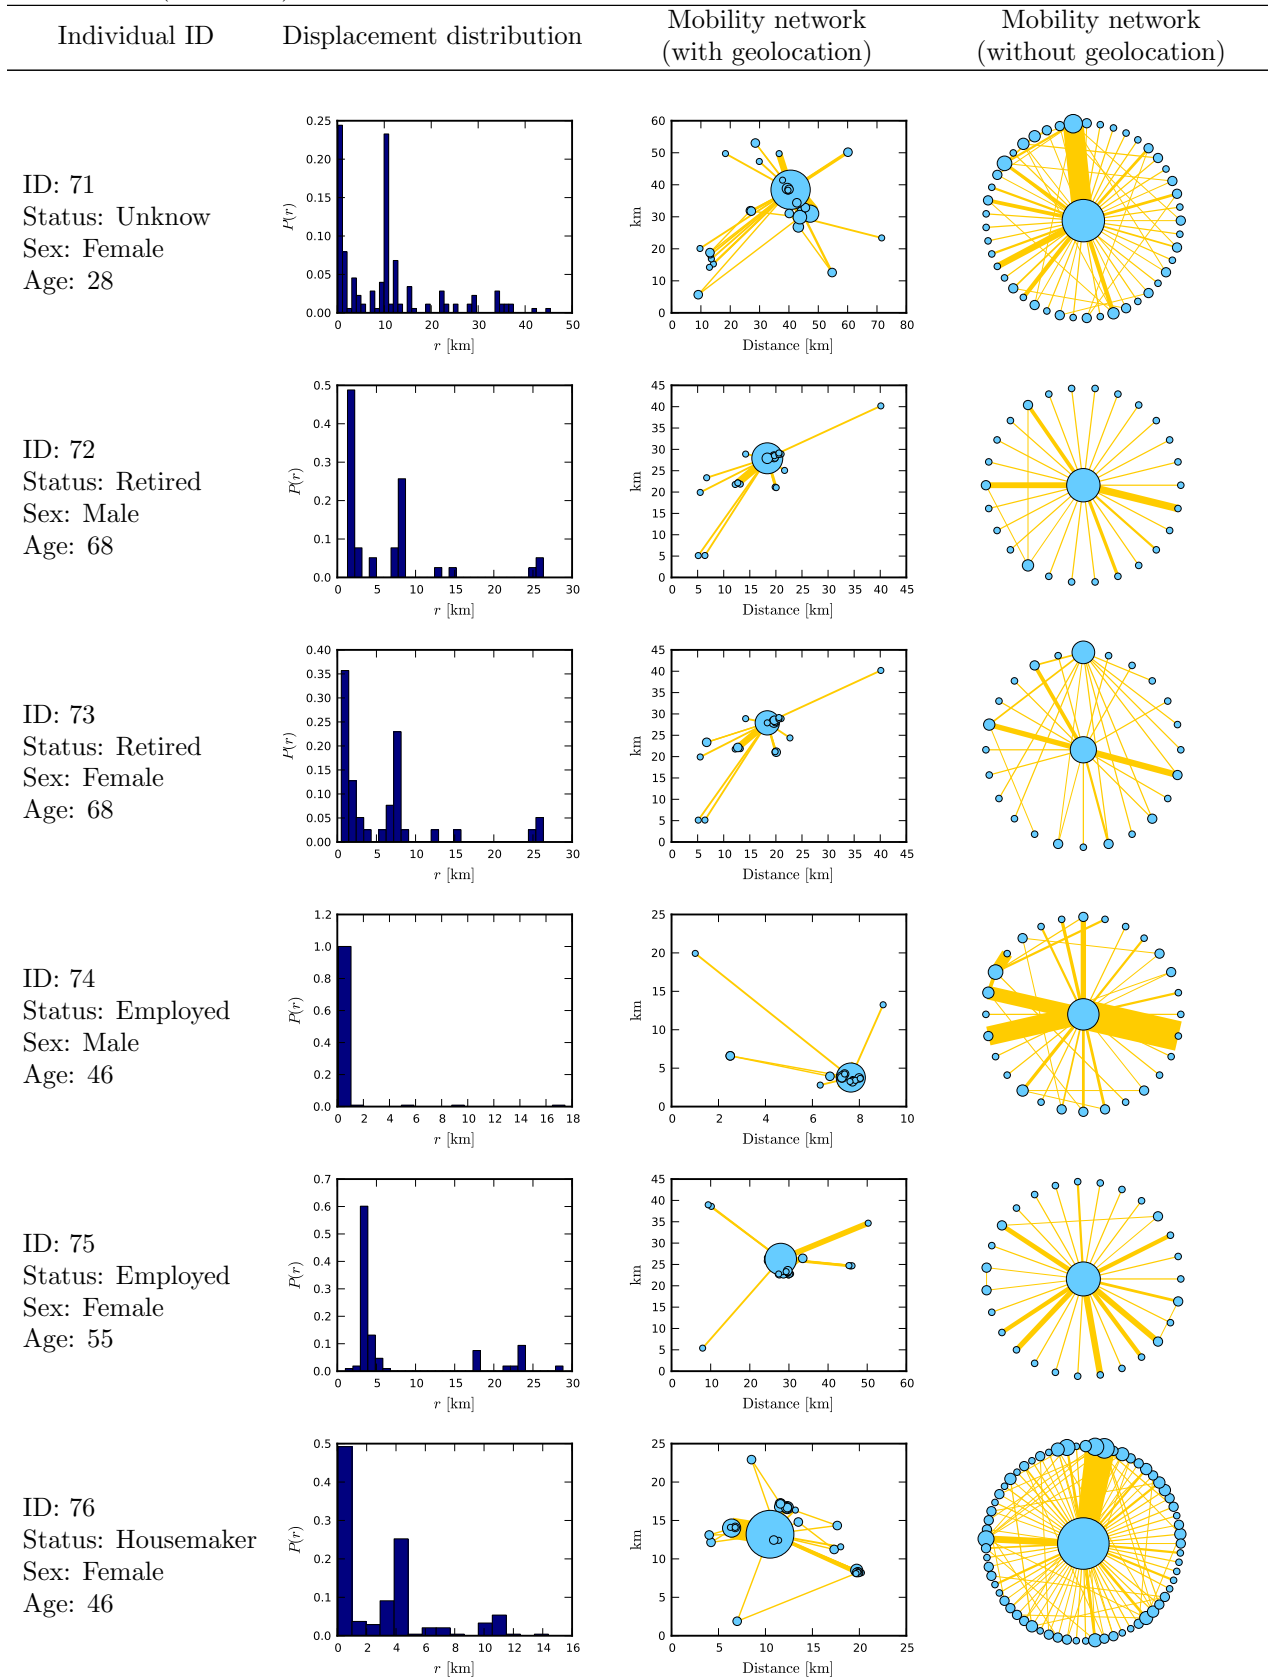

TABLE S1 (continued)

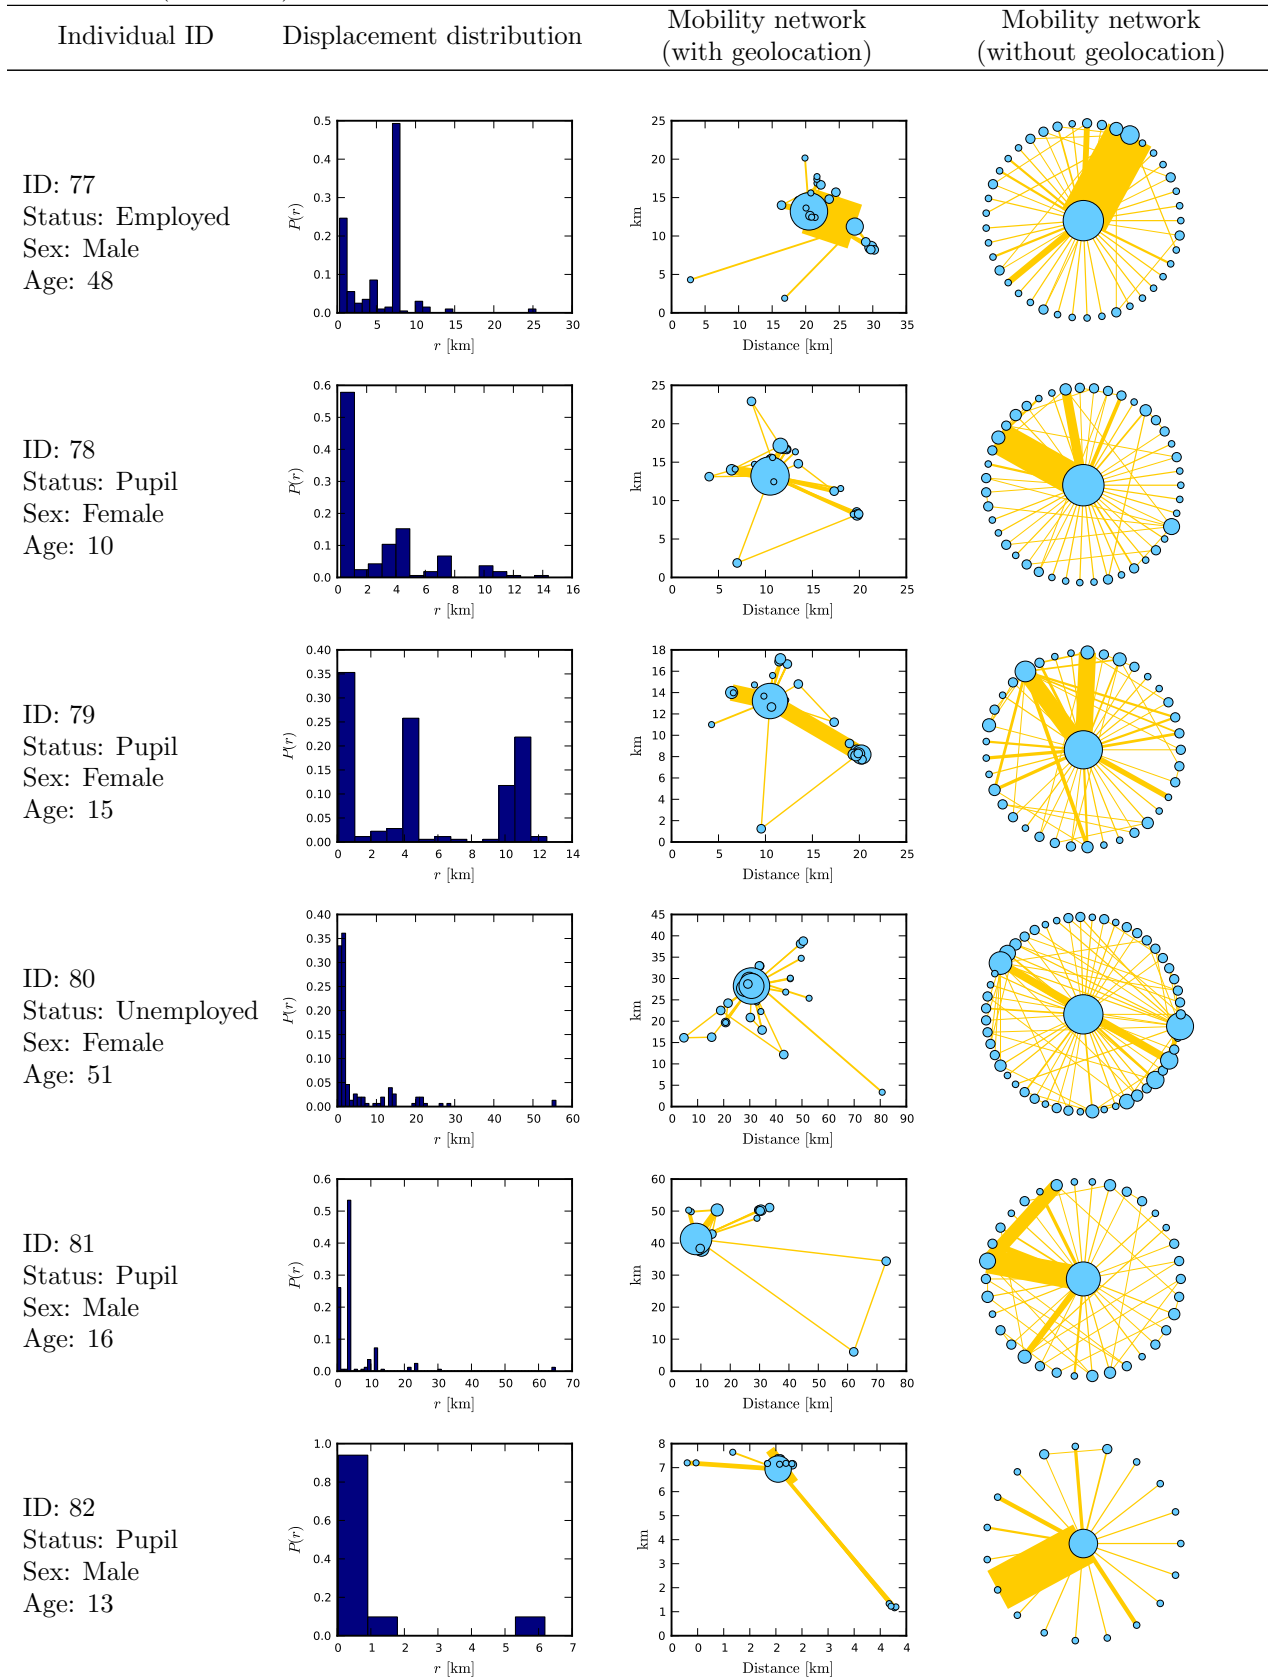

TABLE S1 (continued)

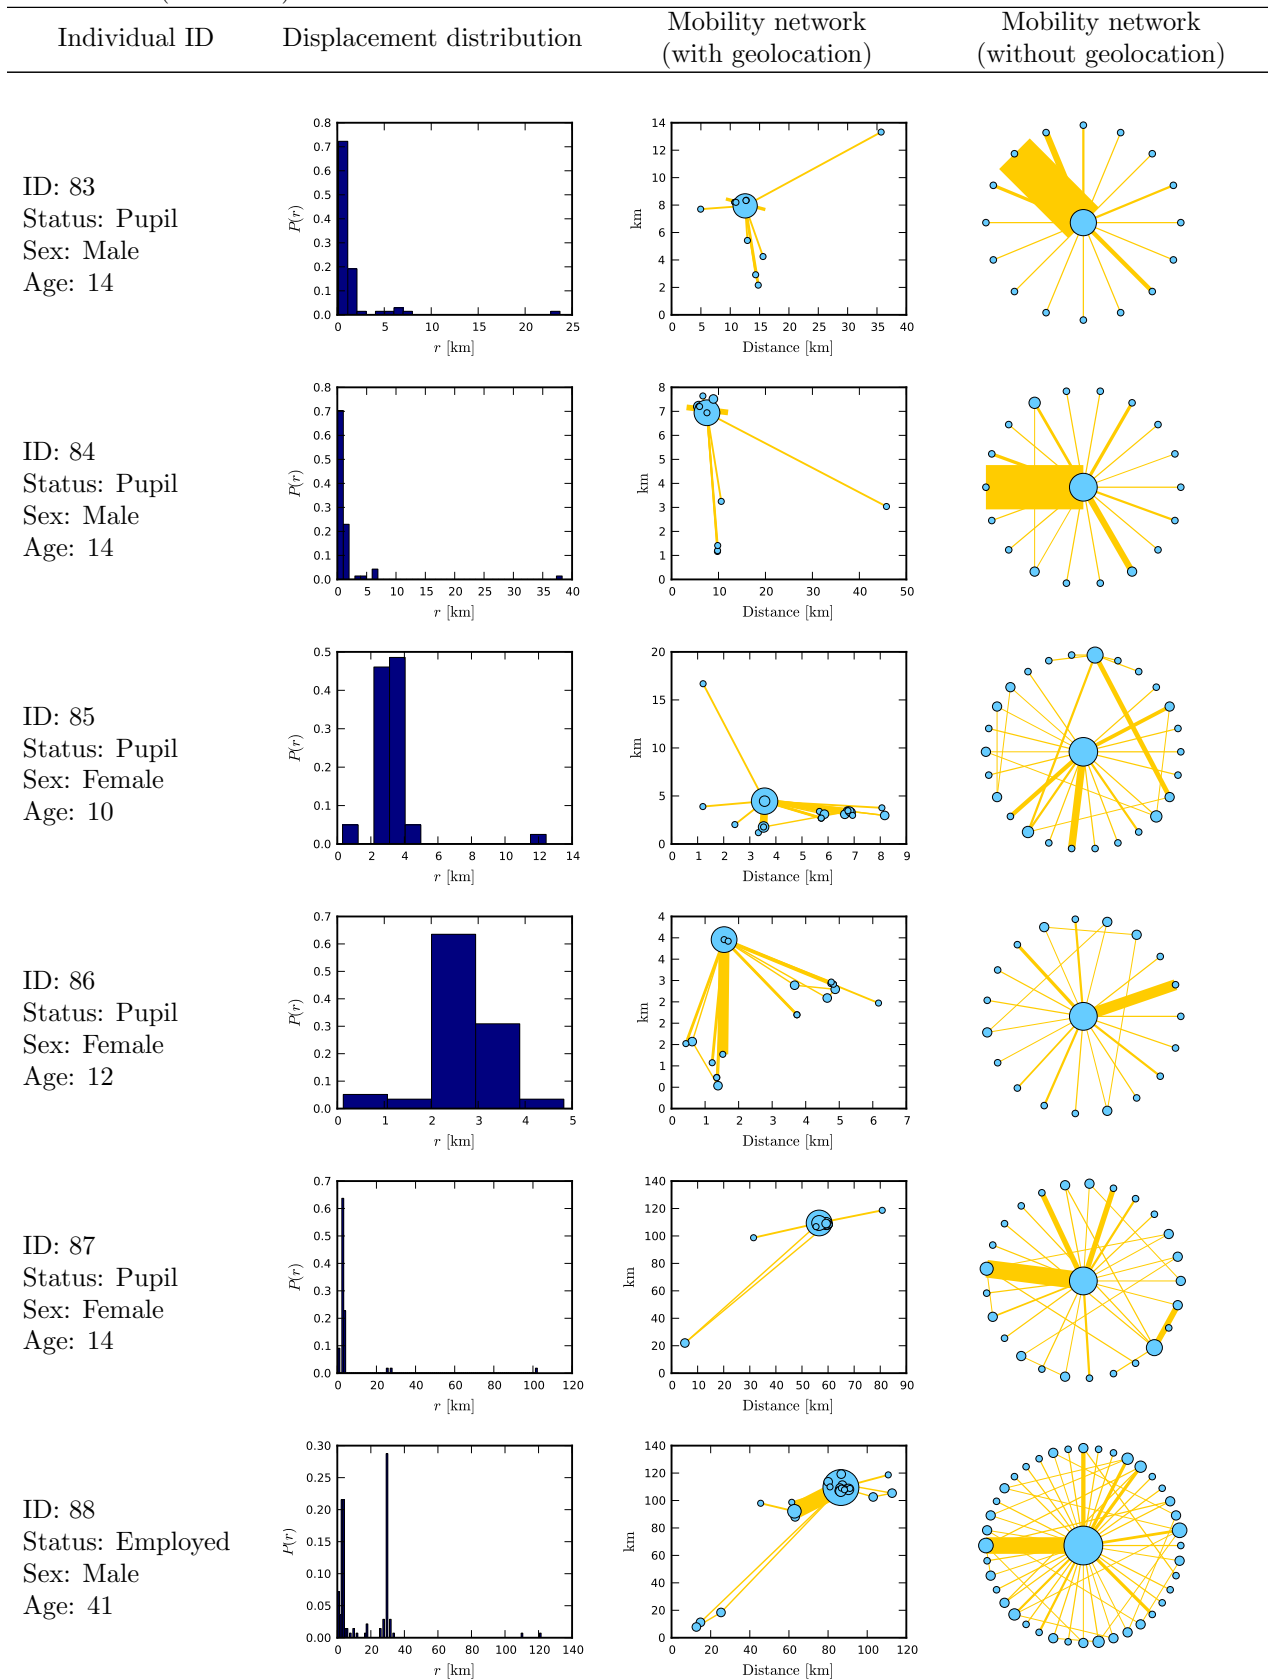

TABLE S1 (continued)

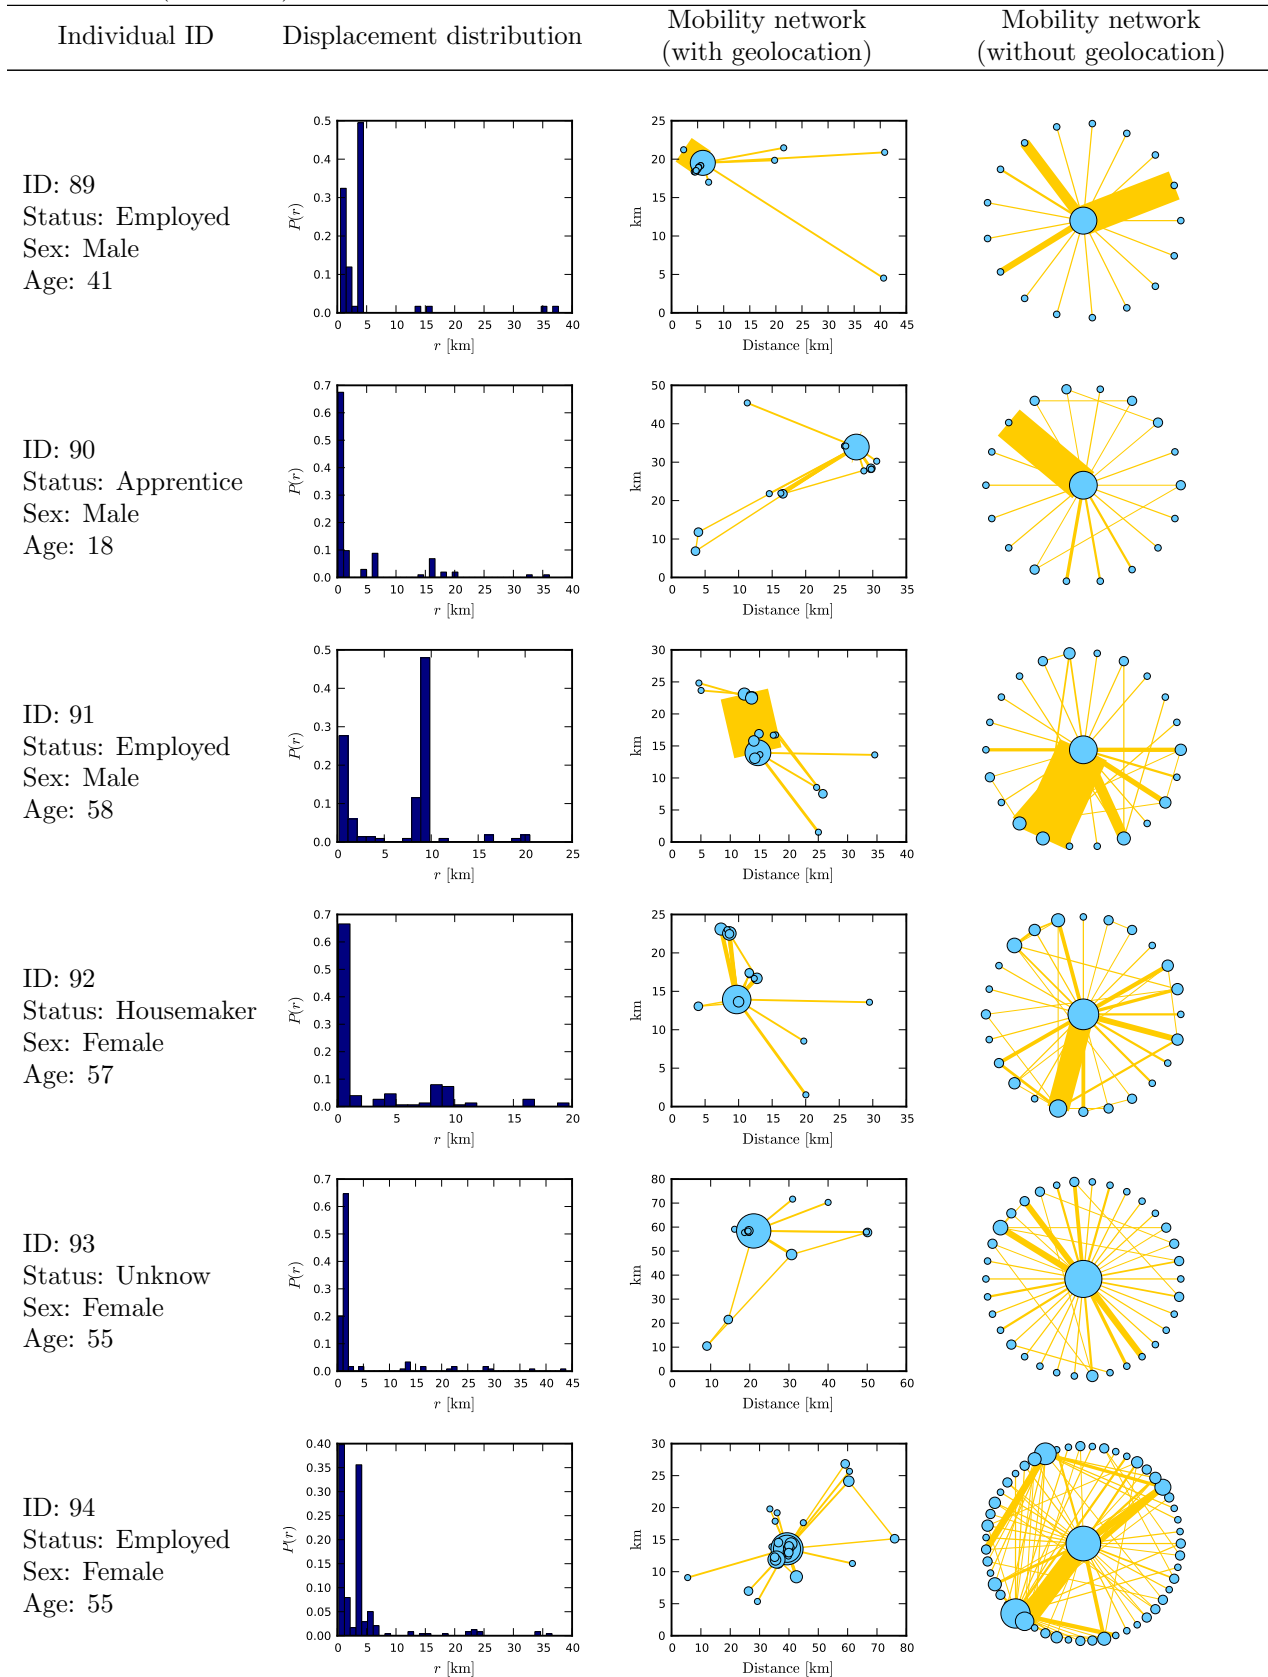



TABLE S1 (continued)

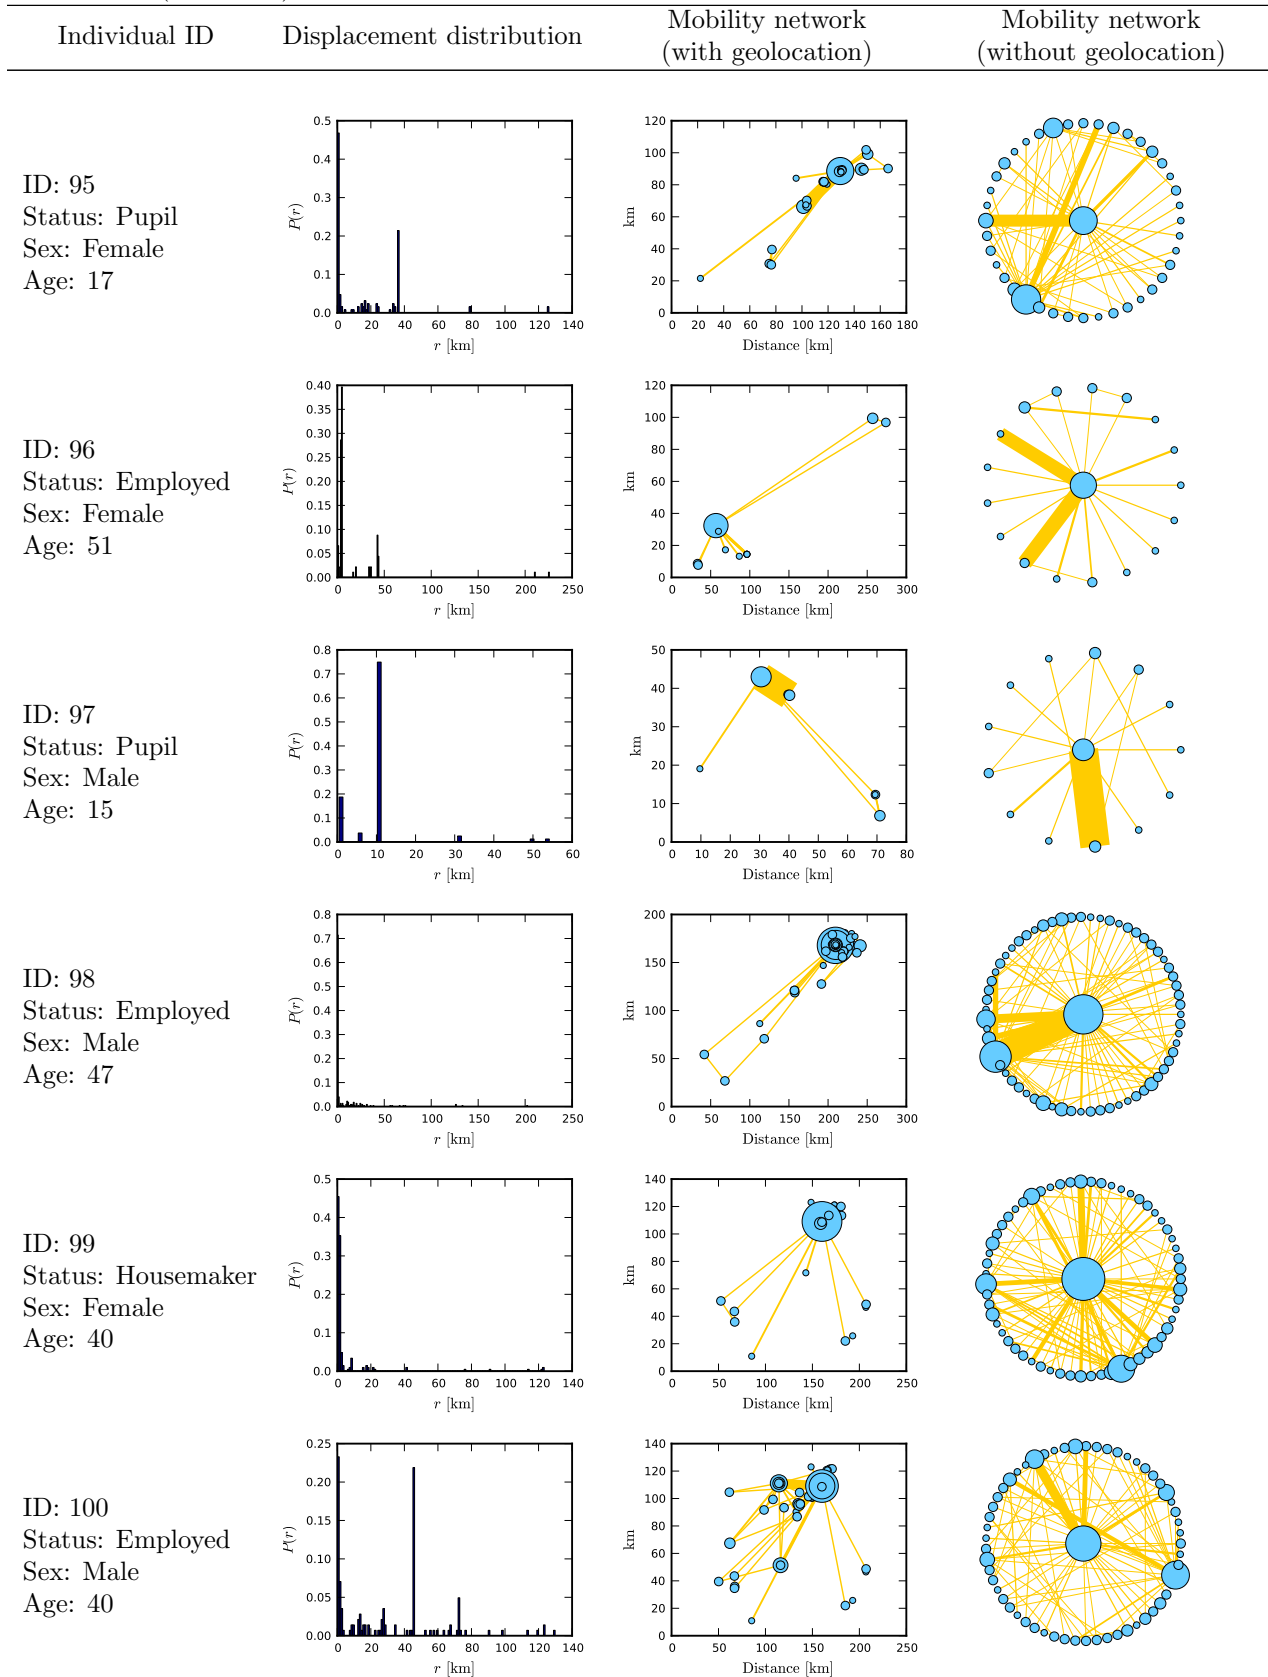

TABLE S1 (continued)

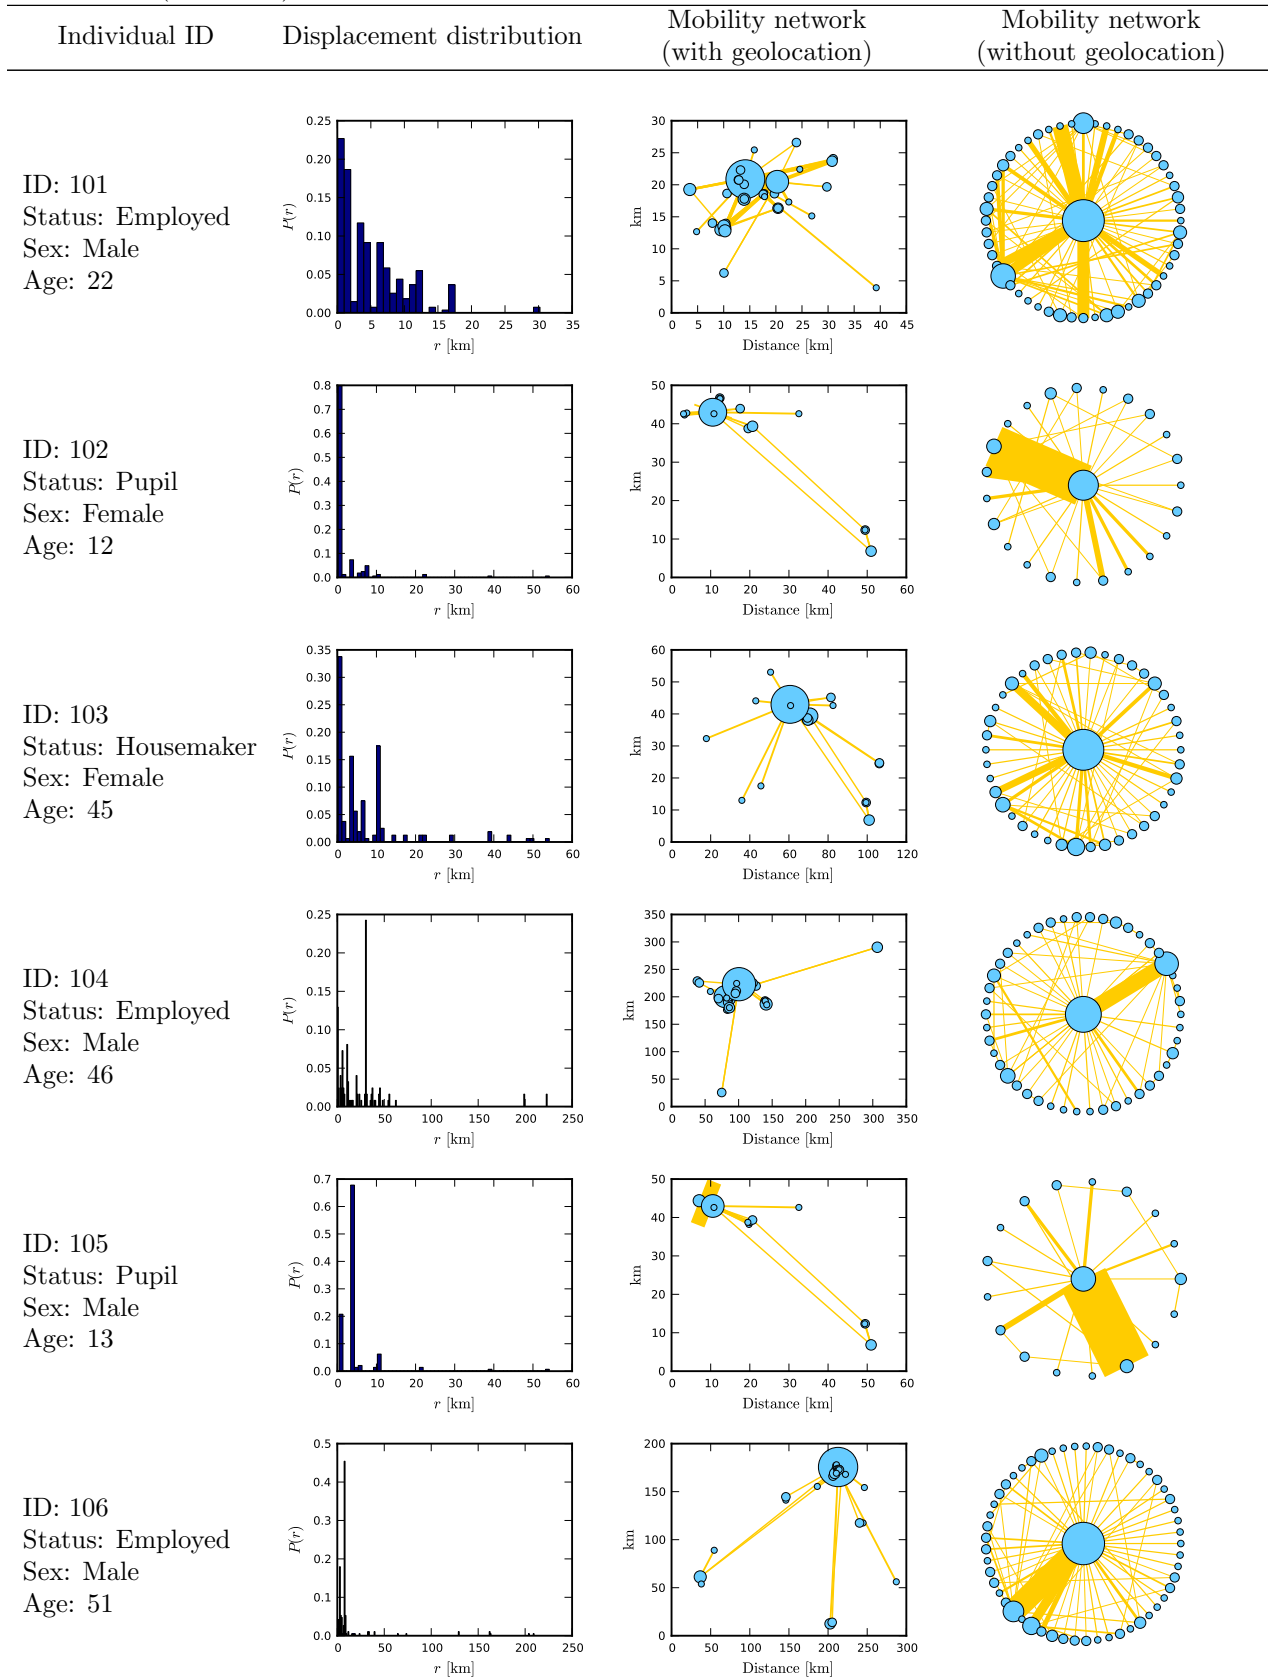

TABLE S1 (continued)

| Individual ID                                         | Displacement distribution | Mobility network (with geolocation) | Mobility network (without geolocation) |
|-------------------------------------------------------|---------------------------|-------------------------------------|----------------------------------------|
| ID: 107<br>Status: Employed<br>Sex: Female<br>Age: 49 |                           |                                     |                                        |
| ID: 108<br>Status: Employed<br>Sex: Male<br>Age: 59   |                           |                                     |                                        |
| ID: 109<br>Status: Employed<br>Sex: Male<br>Age: 60   |                           |                                     |                                        |
| ID: 110<br>Status: Pupil<br>Sex: Female<br>Age: 15    |                           |                                     |                                        |
| ID: 111<br>Status: Employed<br>Sex: Female<br>Age: 28 |                           |                                     |                                        |
| ID: 112<br>Status: Employed<br>Sex: Male<br>Age: 33   |                           |                                     |                                        |

TABLE S1 (continued)

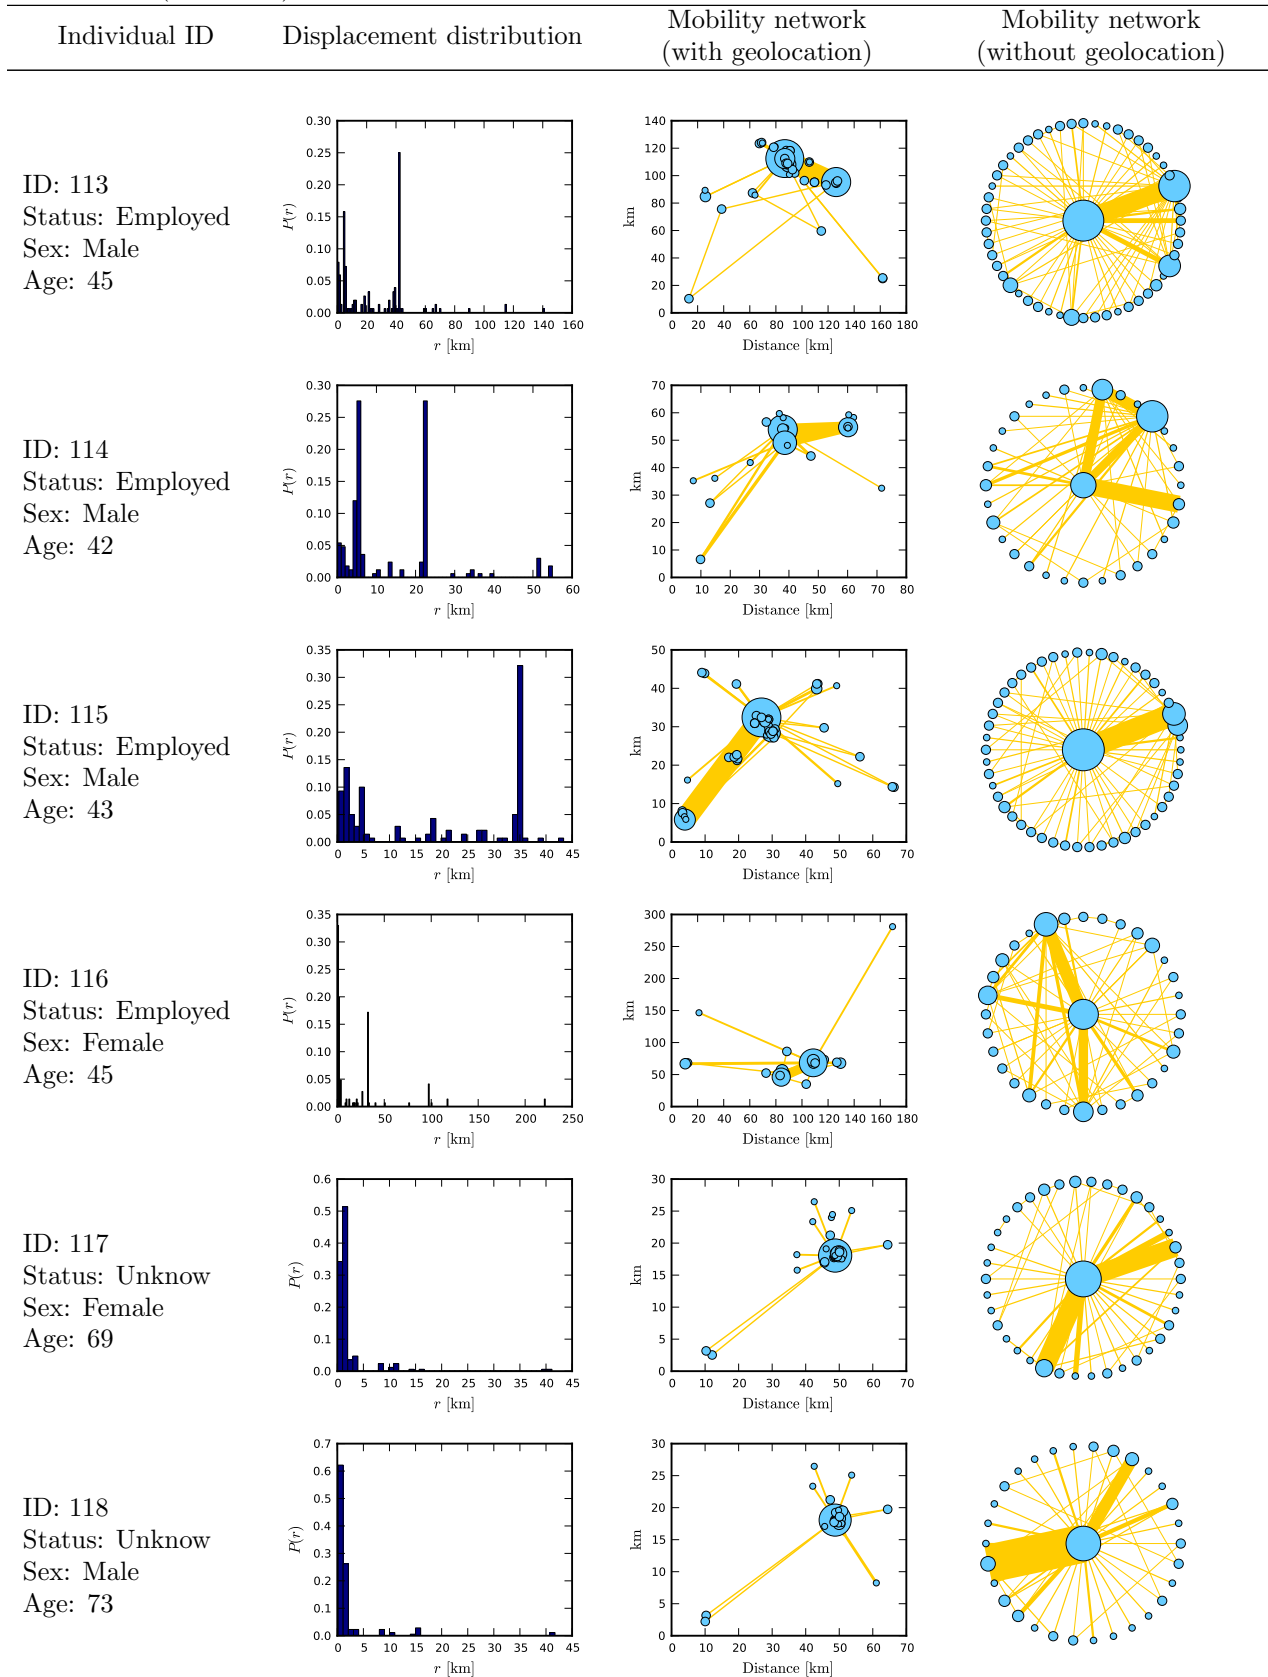

TABLE S1 (continued)

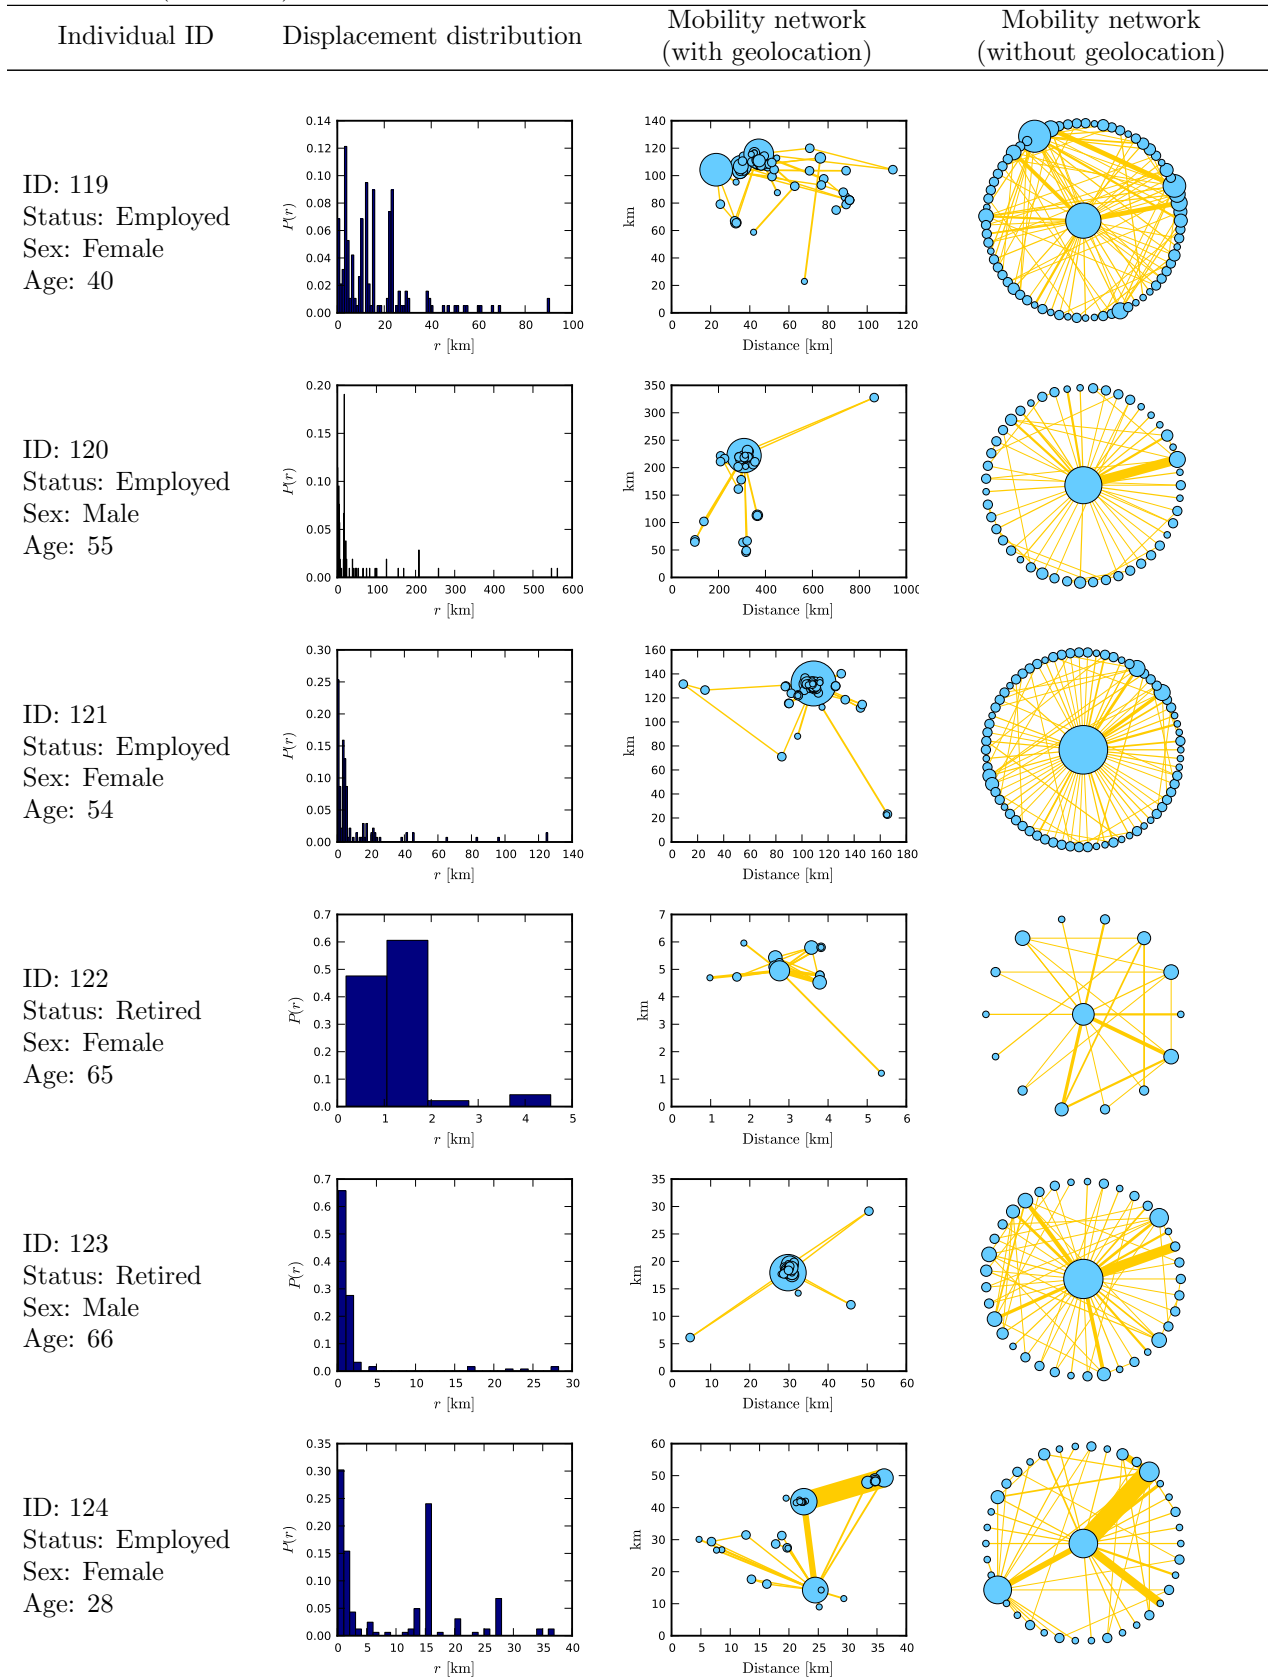

TABLE S1 (continued)

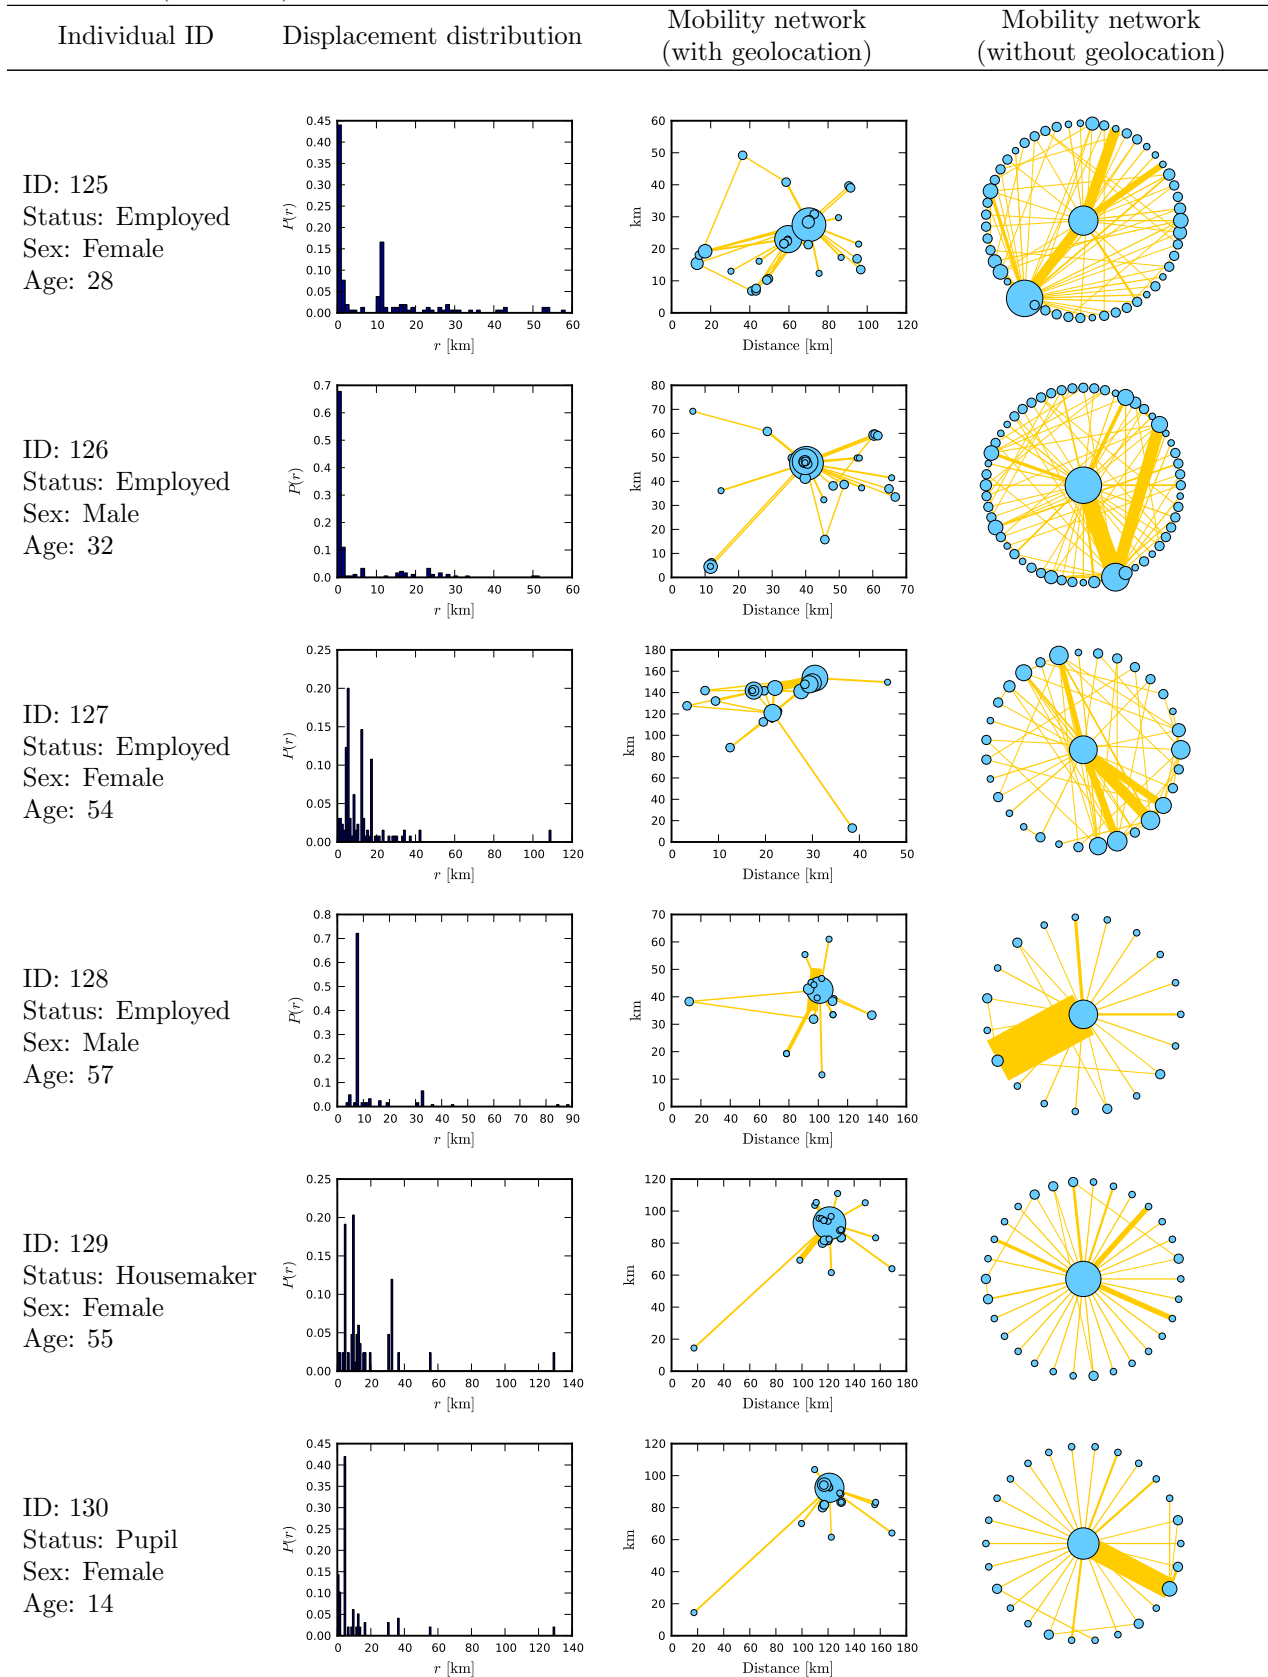

TABLE S1 (continued)

| Individual ID                                           | Displacement distribution | Mobility network (with geolocation) | Mobility network (without geolocation) |
|---------------------------------------------------------|---------------------------|-------------------------------------|----------------------------------------|
| ID: 131<br>Status: Housemaker<br>Sex: Female<br>Age: 37 |                           |                                     |                                        |
| ID: 132<br>Status: Employed<br>Sex: Male<br>Age: 36     |                           |                                     |                                        |
| ID: 133<br>Status: Employed<br>Sex: Female<br>Age: 27   |                           |                                     |                                        |
| ID: 134<br>Status: Housemaker<br>Sex: Female<br>Age: 53 |                           |                                     |                                        |
| ID: 135<br>Status: Employed<br>Sex: Male<br>Age: 58     |                           |                                     |                                        |
| ID: 136<br>Status: Employed<br>Sex: Male<br>Age: 34     |                           |                                     |                                        |

TABLE S1 (continued)

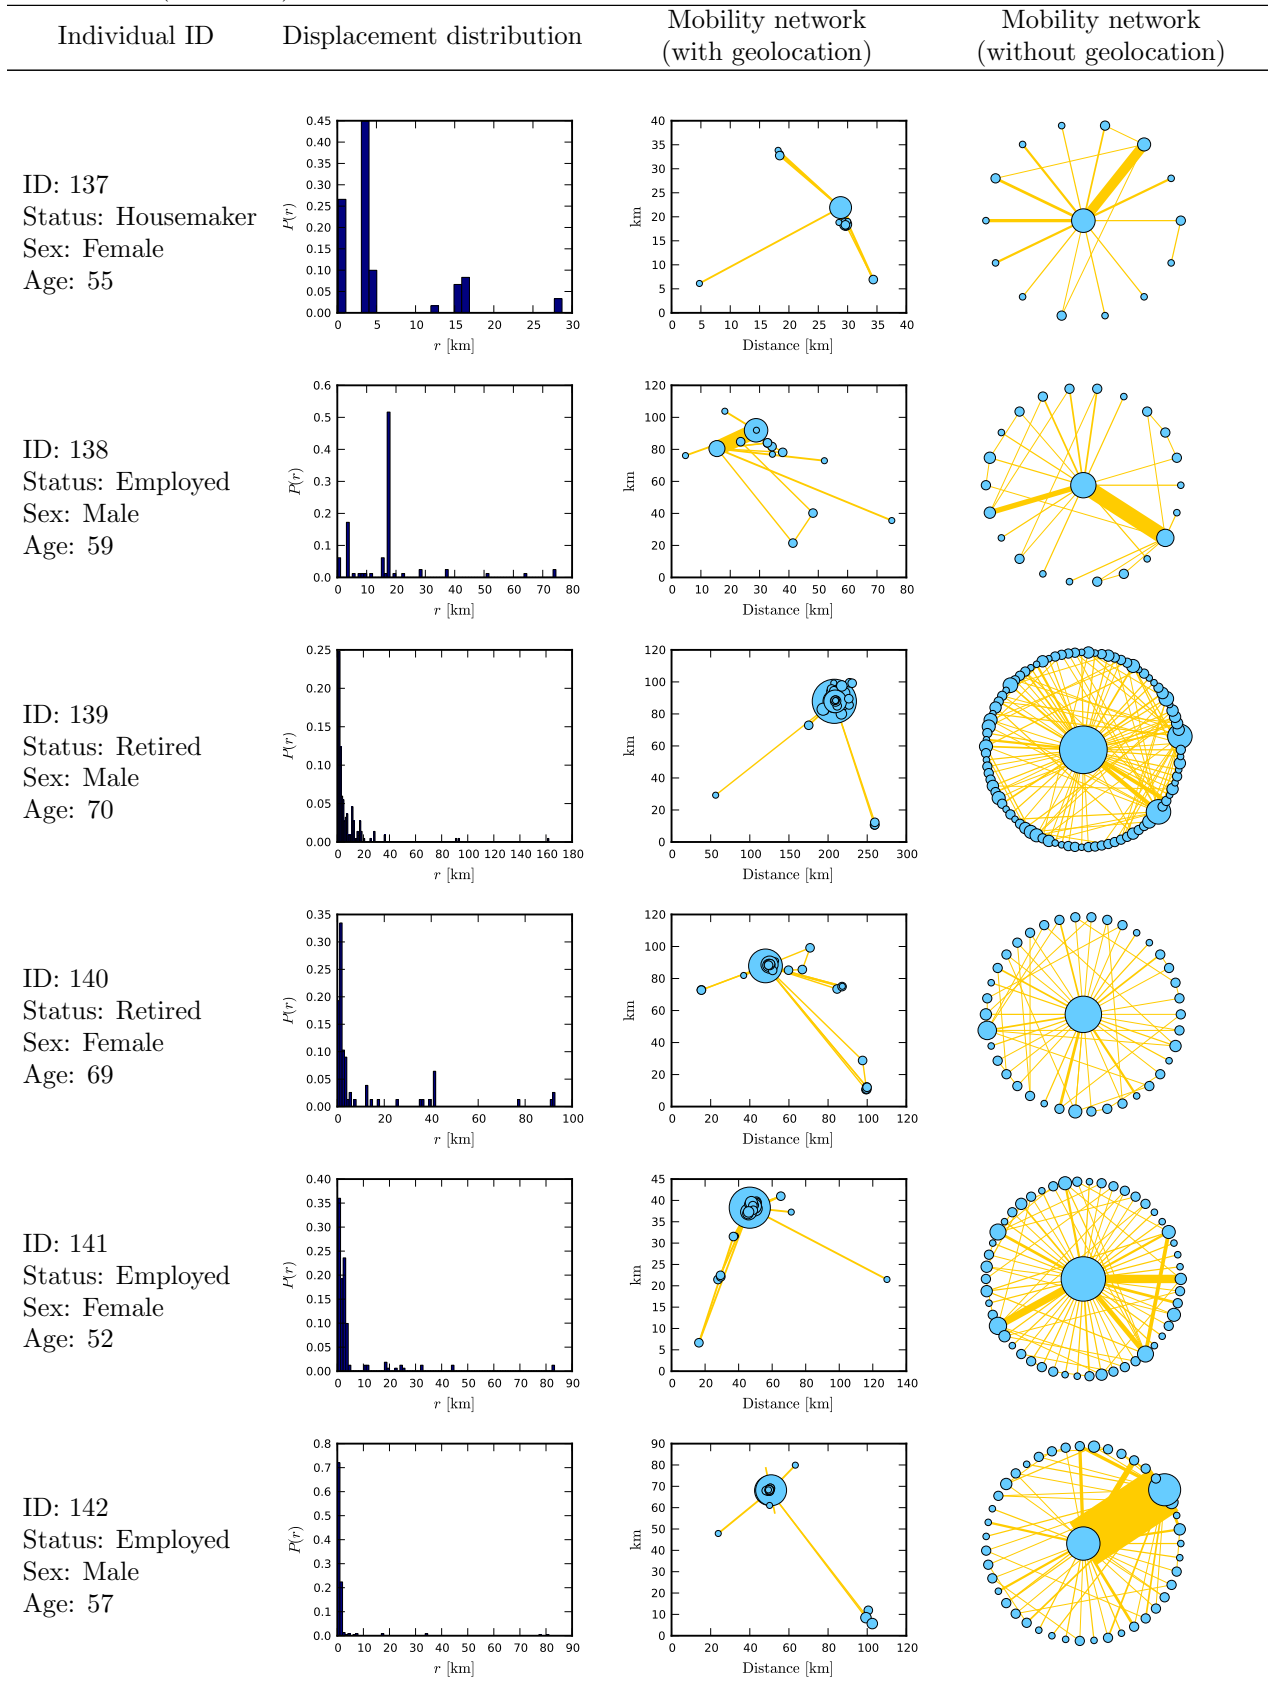



TABLE S1 (continued)

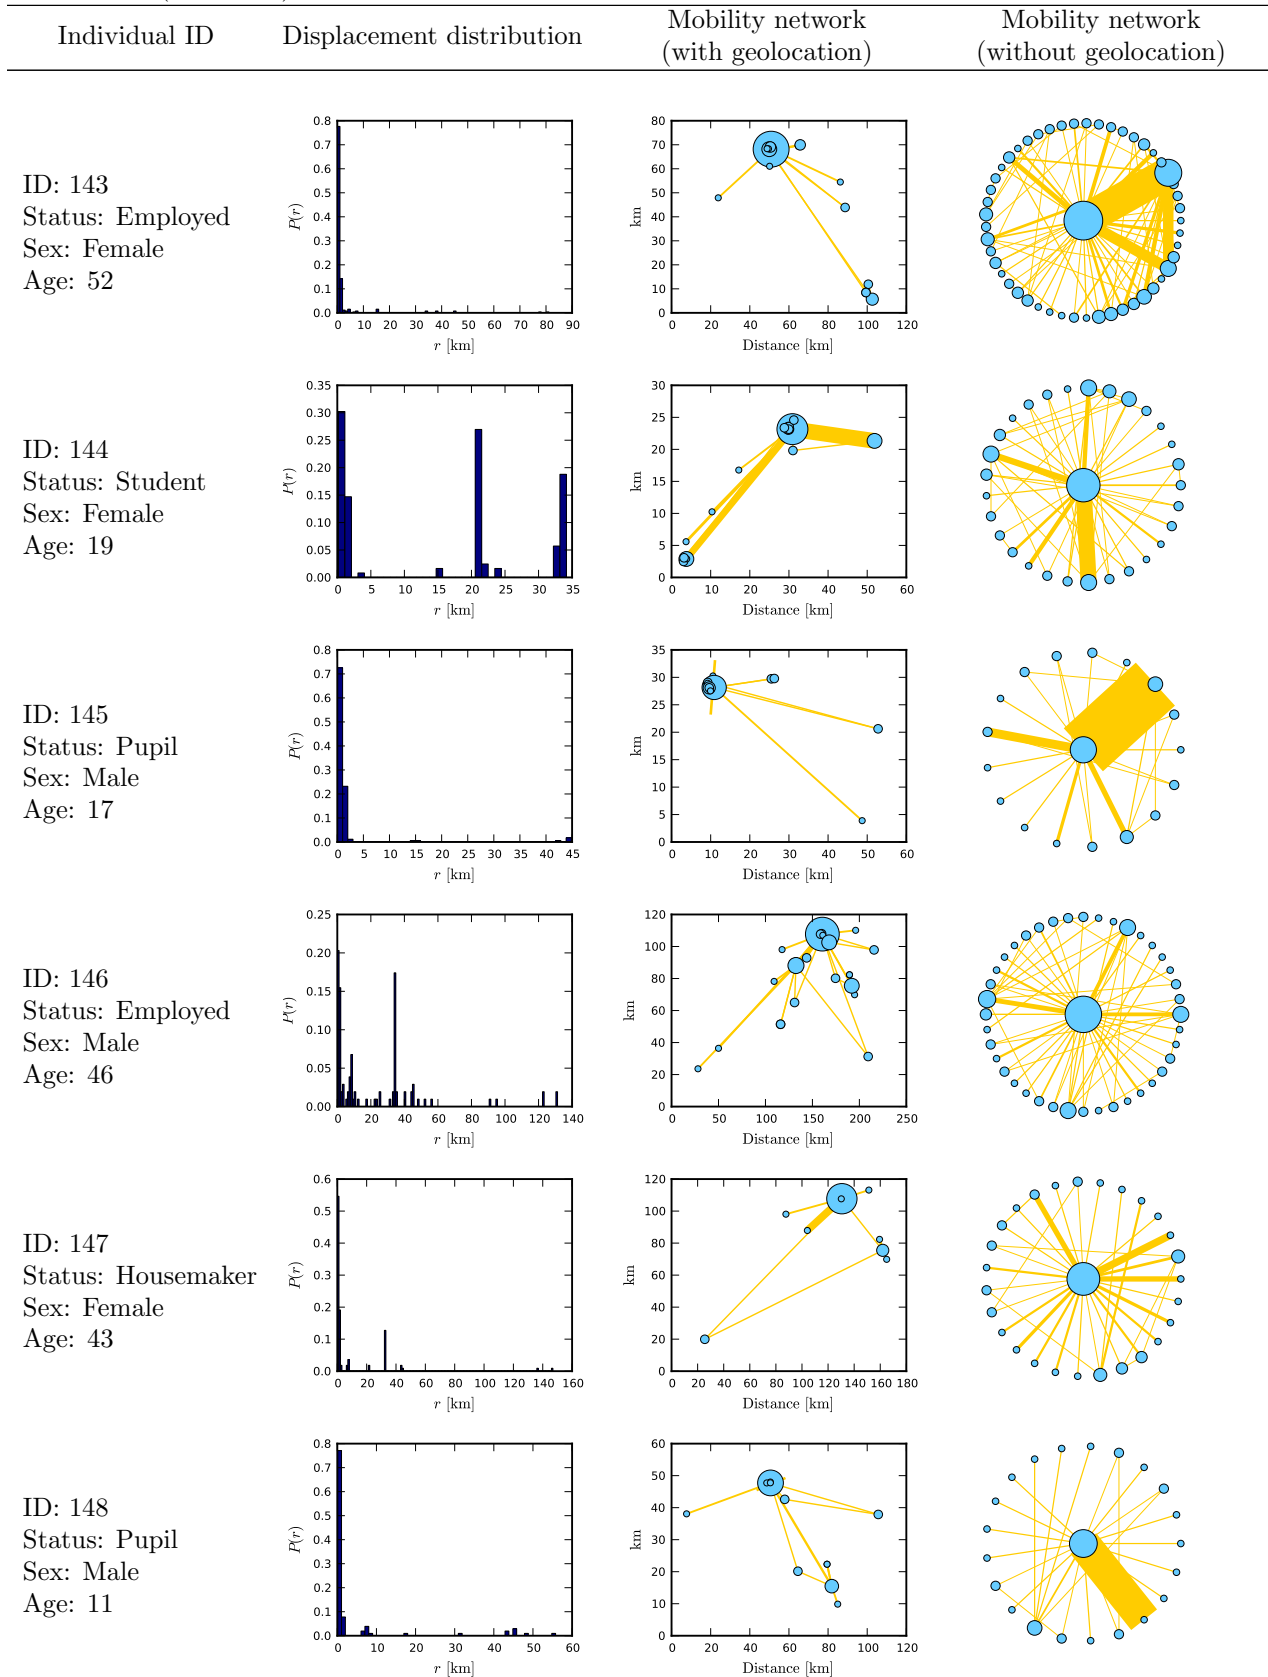

TABLE S1 (continued)

| Individual ID                                                   | Displacement distribution | Mobility network<br>(with geolocation) | Mobility network<br>(without geolocation) |
|-----------------------------------------------------------------|---------------------------|----------------------------------------|-------------------------------------------|
| <p>ID: 149<br/>Status: Unknow<br/>Sex: Female<br/>Age: 30</p>   |                           |                                        |                                           |
| <p>ID: 150<br/>Status: Pupil<br/>Sex: Female<br/>Age: 13</p>    |                           |                                        |                                           |
| <p>ID: 151<br/>Status: Employed<br/>Sex: Male<br/>Age: 59</p>   |                           |                                        |                                           |
| <p>ID: 152<br/>Status: Employed<br/>Sex: Female<br/>Age: 25</p> |                           |                                        |                                           |
| <p>ID: 153<br/>Status: Employed<br/>Sex: Male<br/>Age: 29</p>   |                           |                                        |                                           |
| <p>ID: 154<br/>Status: Employed<br/>Sex: Male<br/>Age: 53</p>   |                           |                                        |                                           |

TABLE S1 (continued)

| Individual ID                                                   | Displacement distribution | Mobility network<br>(with geolocation) | Mobility network<br>(without geolocation) |
|-----------------------------------------------------------------|---------------------------|----------------------------------------|-------------------------------------------|
| <p>ID: 155<br/>Status: Employed<br/>Sex: Female<br/>Age: 43</p> |                           |                                        |                                           |
| <p>ID: 156<br/>Status: Employed<br/>Sex: Male<br/>Age: 52</p>   |                           |                                        |                                           |
| <p>ID: 157<br/>Status: Employed<br/>Sex: Female<br/>Age: 22</p> |                           |                                        |                                           |
| <p>ID: 158<br/>Status: Employed<br/>Sex: Female<br/>Age: 39</p> |                           |                                        |                                           |
| <p>ID: 159<br/>Status: Employed<br/>Sex: Male<br/>Age: 41</p>   |                           |                                        |                                           |
| <p>ID: 160<br/>Status: Pupil<br/>Sex: Male<br/>Age: 13</p>      |                           |                                        |                                           |

TABLE S1 (continued)

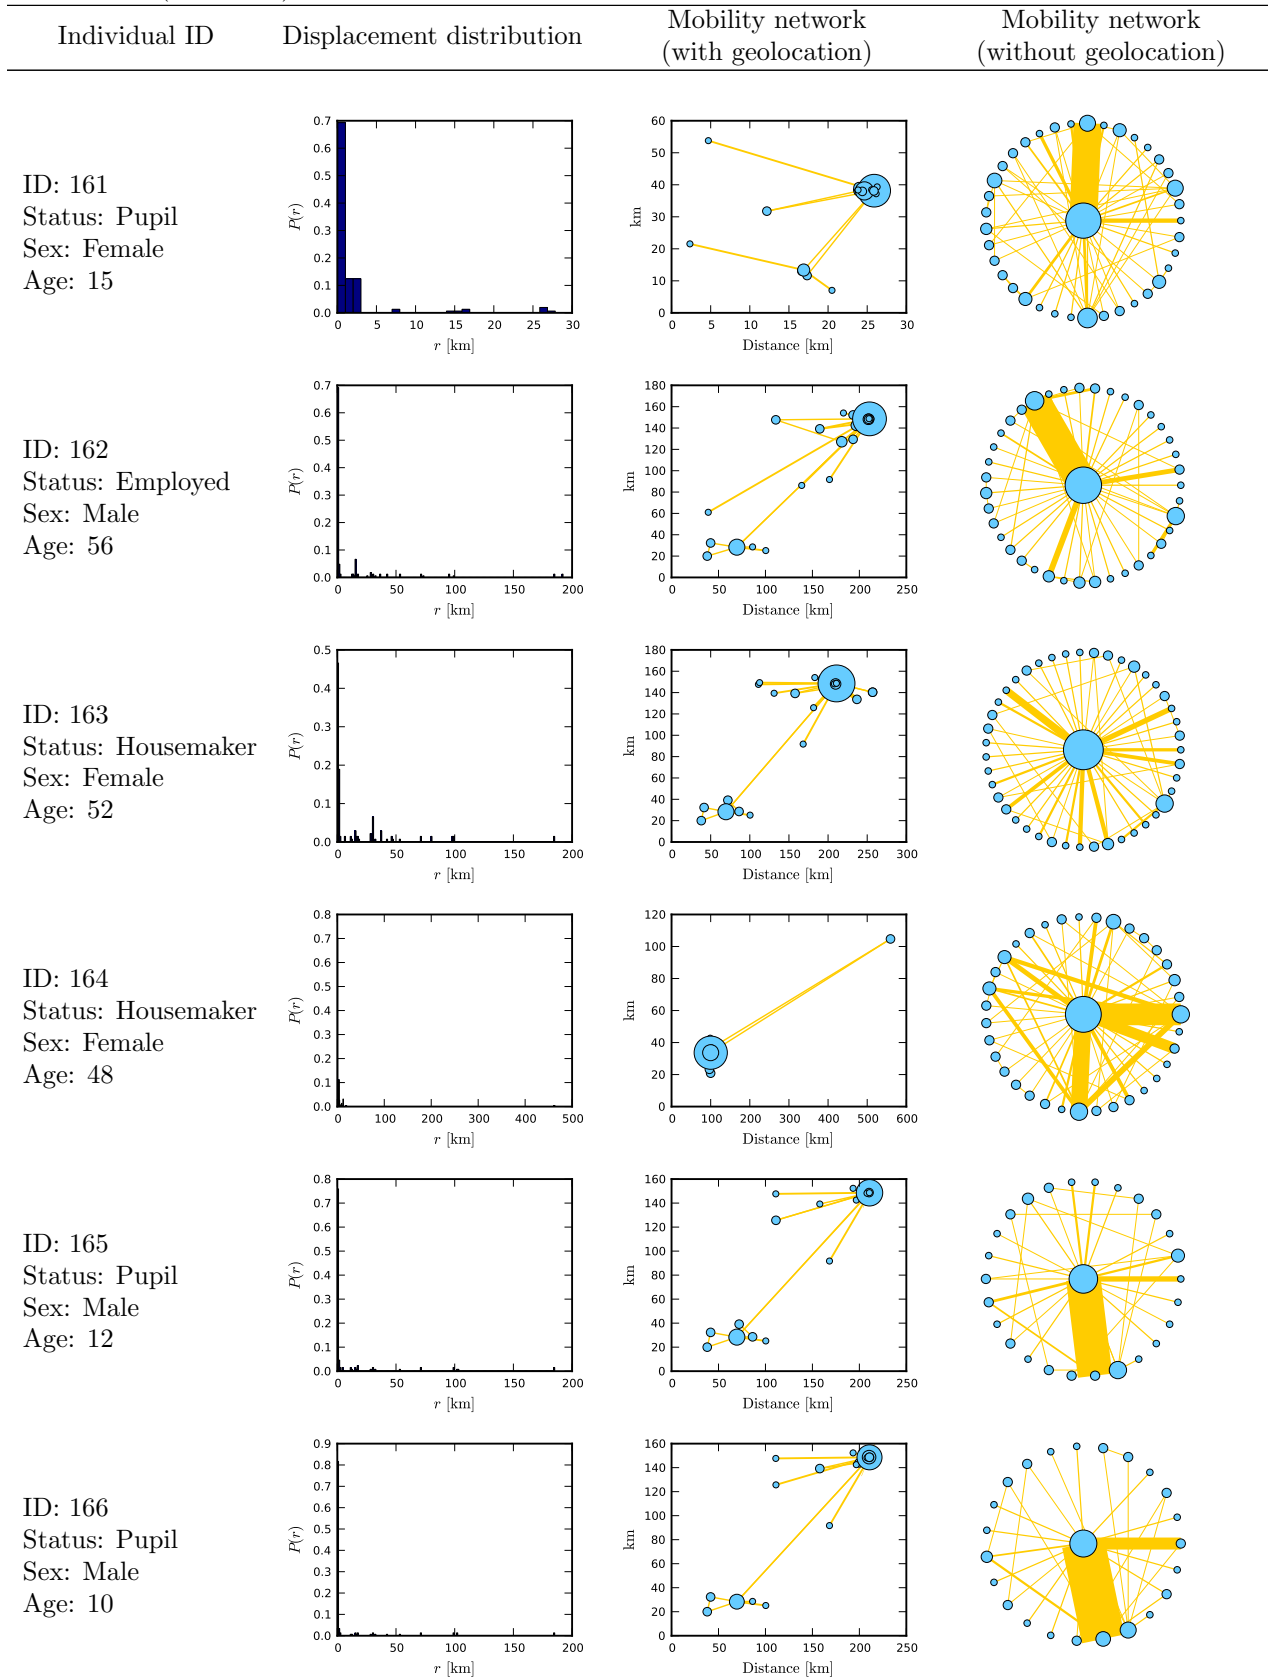

TABLE S1 (continued)

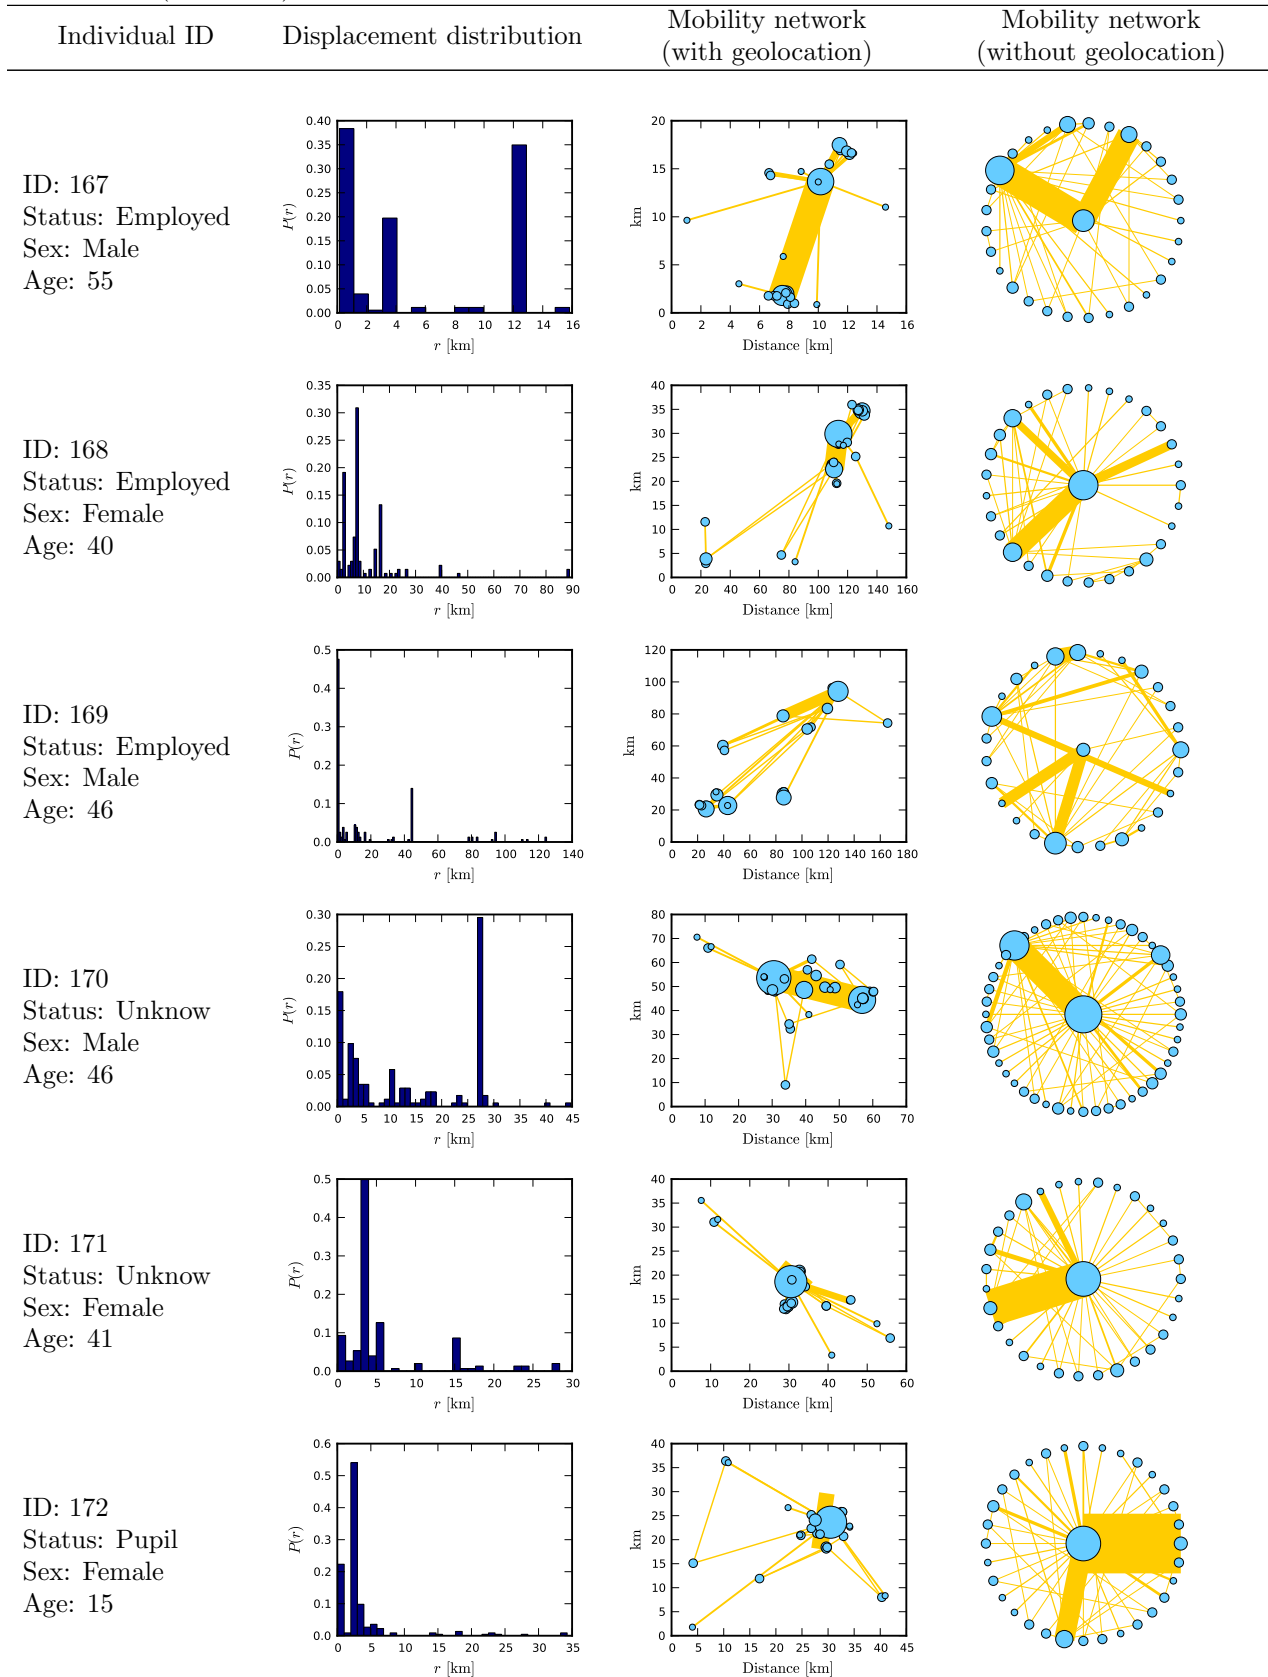

TABLE S1 (continued)

| Individual ID                                                     | Displacement distribution | Mobility network<br>(with geolocation) | Mobility network<br>(without geolocation) |
|-------------------------------------------------------------------|---------------------------|----------------------------------------|-------------------------------------------|
| <p>ID: 173<br/>Status: Pupil<br/>Sex: Male<br/>Age: 15</p>        |                           |                                        |                                           |
| <p>ID: 174<br/>Status: Student<br/>Sex: Female<br/>Age: 20</p>    |                           |                                        |                                           |
| <p>ID: 175<br/>Status: Retired<br/>Sex: Female<br/>Age: 61</p>    |                           |                                        |                                           |
| <p>ID: 176<br/>Status: Employed<br/>Sex: Male<br/>Age: 46</p>     |                           |                                        |                                           |
| <p>ID: 177<br/>Status: Apprentice<br/>Sex: Male<br/>Age: 16</p>   |                           |                                        |                                           |
| <p>ID: 178<br/>Status: Apprentice<br/>Sex: Female<br/>Age: 17</p> |                           |                                        |                                           |

TABLE S1 (continued)

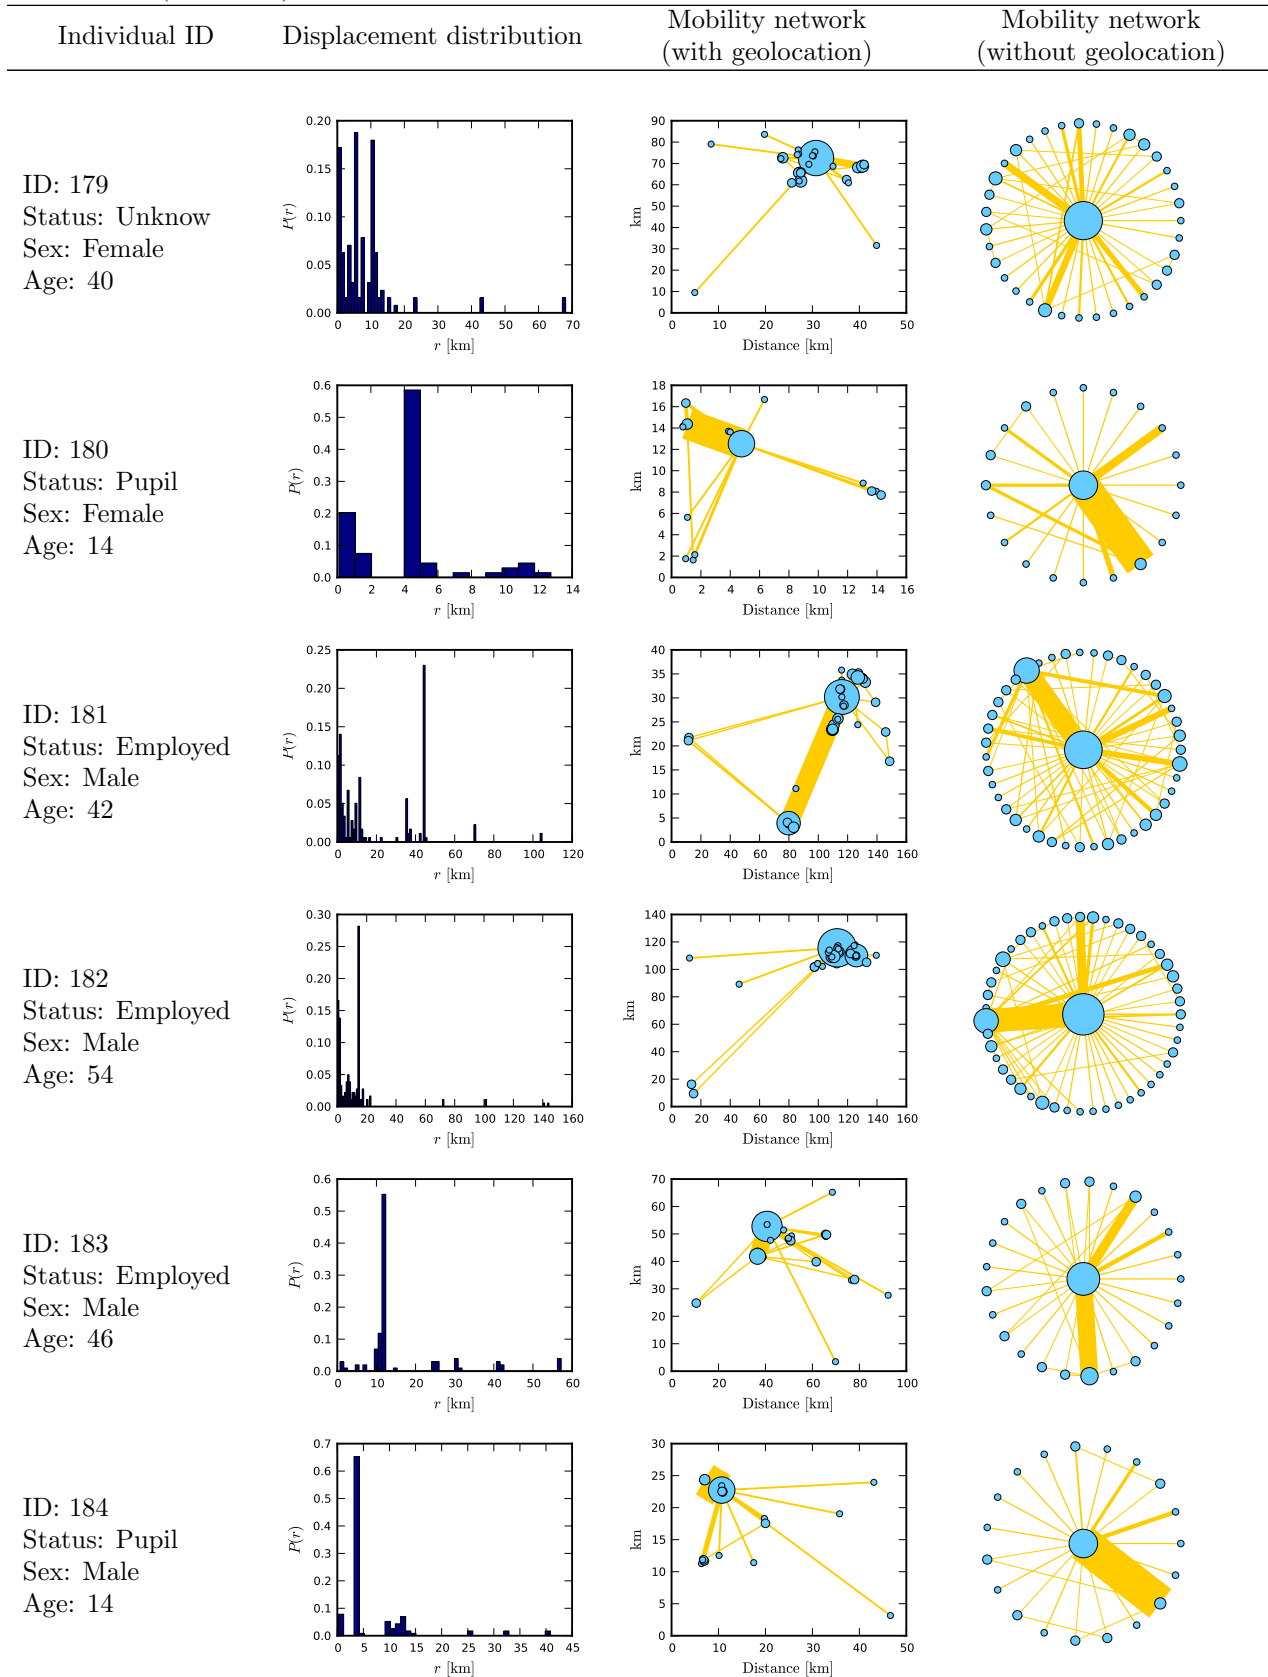

TABLE S1 (continued)

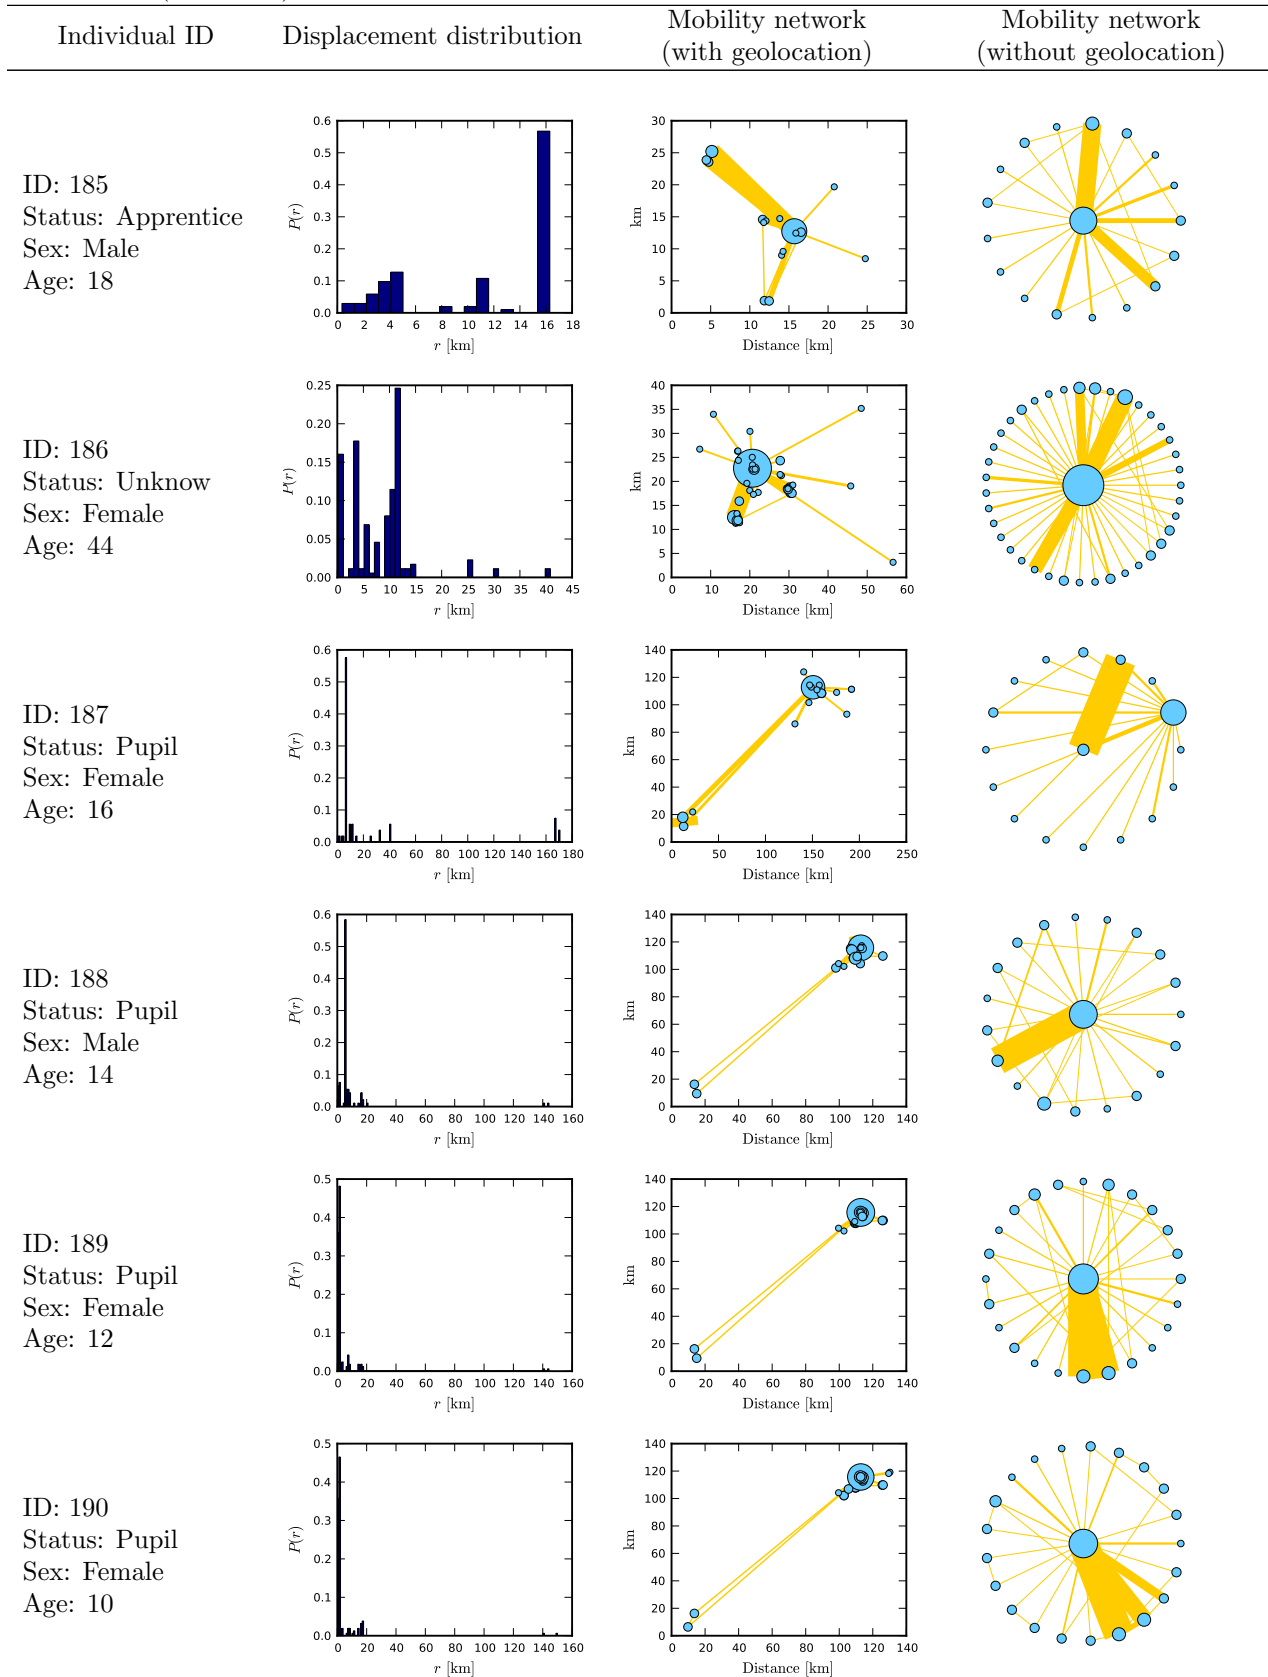



TABLE S1 (continued)

| Individual ID                                           | Displacement distribution | Mobility network<br>(with geolocation) | Mobility network<br>(without geolocation) |
|---------------------------------------------------------|---------------------------|----------------------------------------|-------------------------------------------|
| ID: 191<br>Status: Unknow<br>Sex: Male<br>Age: 51       |                           |                                        |                                           |
| ID: 192<br>Status: Employed<br>Sex: Male<br>Age: 49     |                           |                                        |                                           |
| ID: 193<br>Status: Pupil<br>Sex: Male<br>Age: 10        |                           |                                        |                                           |
| ID: 194<br>Status: Housemaker<br>Sex: Female<br>Age: 42 |                           |                                        |                                           |
| ID: 195<br>Status: Pupil<br>Sex: Female<br>Age: 13      |                           |                                        |                                           |
| ID: 196<br>Status: Pupil<br>Sex: Female<br>Age: 10      |                           |                                        |                                           |

TABLE S1 (continued)

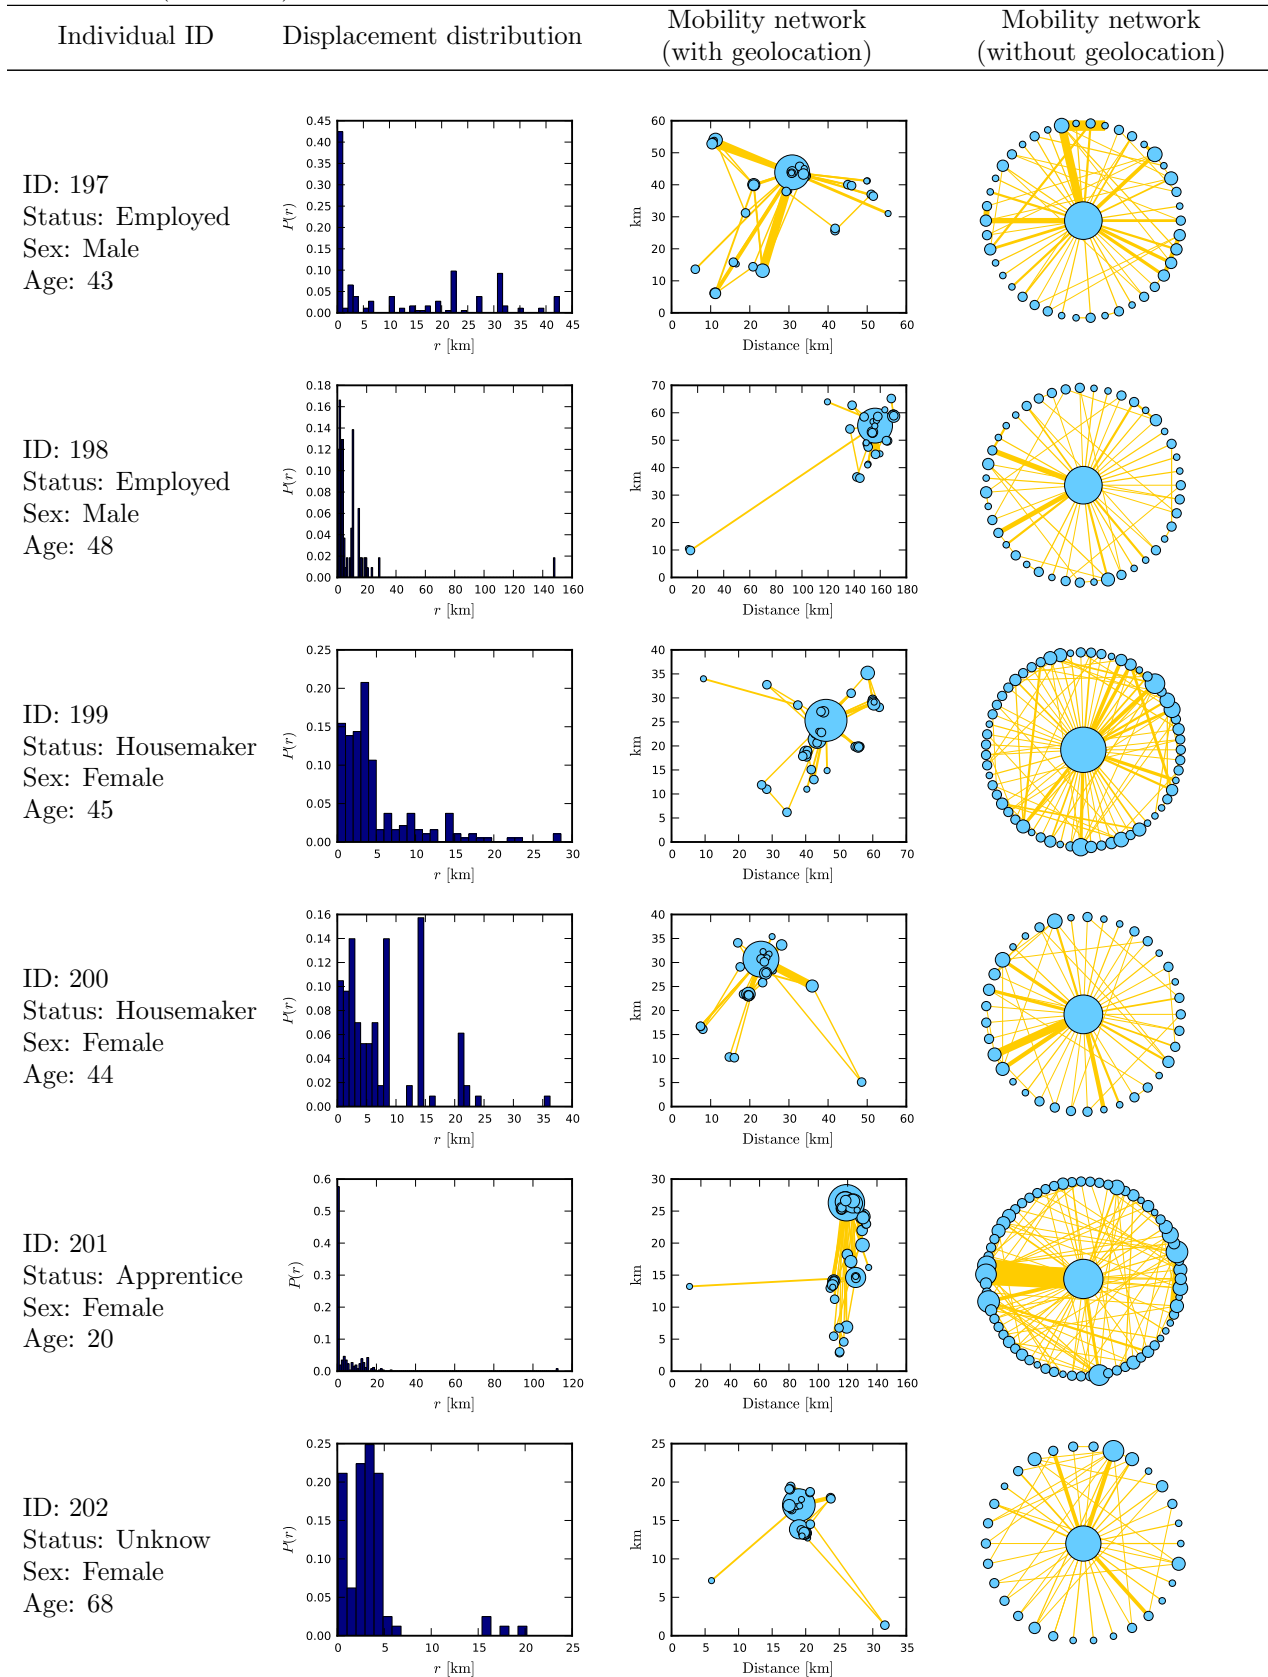

TABLE S1 (continued)

| Individual ID                                         | Displacement distribution | Mobility network<br>(with geolocation) | Mobility network<br>(without geolocation) |
|-------------------------------------------------------|---------------------------|----------------------------------------|-------------------------------------------|
| ID: 203<br>Status: Retired<br>Sex: Male<br>Age: 71    |                           |                                        |                                           |
| ID: 204<br>Status: Employed<br>Sex: Male<br>Age: 41   |                           |                                        |                                           |
| ID: 205<br>Status: Unknow<br>Sex: Female<br>Age: 47   |                           |                                        |                                           |
| ID: 206<br>Status: Employed<br>Sex: Male<br>Age: 35   |                           |                                        |                                           |
| ID: 207<br>Status: Employed<br>Sex: Female<br>Age: 58 |                           |                                        |                                           |
| ID: 208<br>Status: Employed<br>Sex: Male<br>Age: 41   |                           |                                        |                                           |

TABLE S1 (continued)

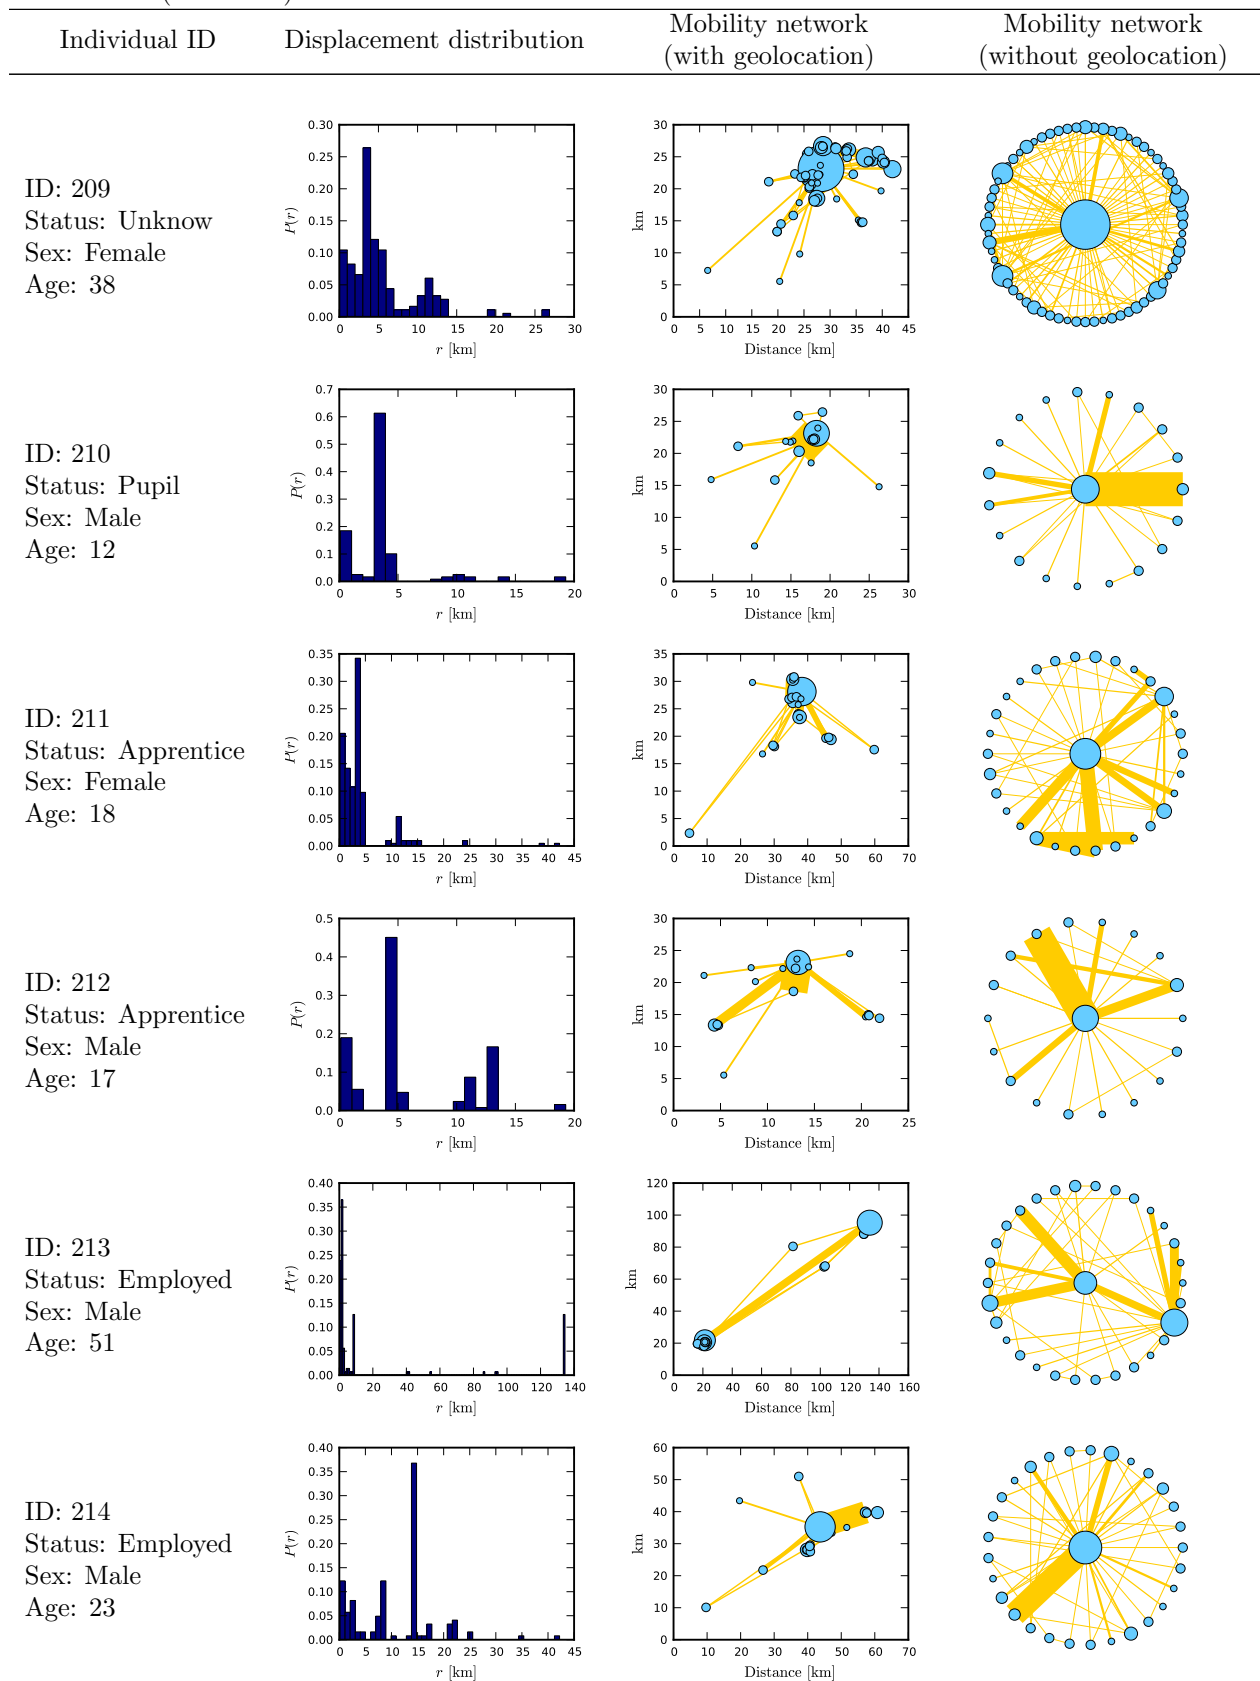

TABLE S1 (continued)

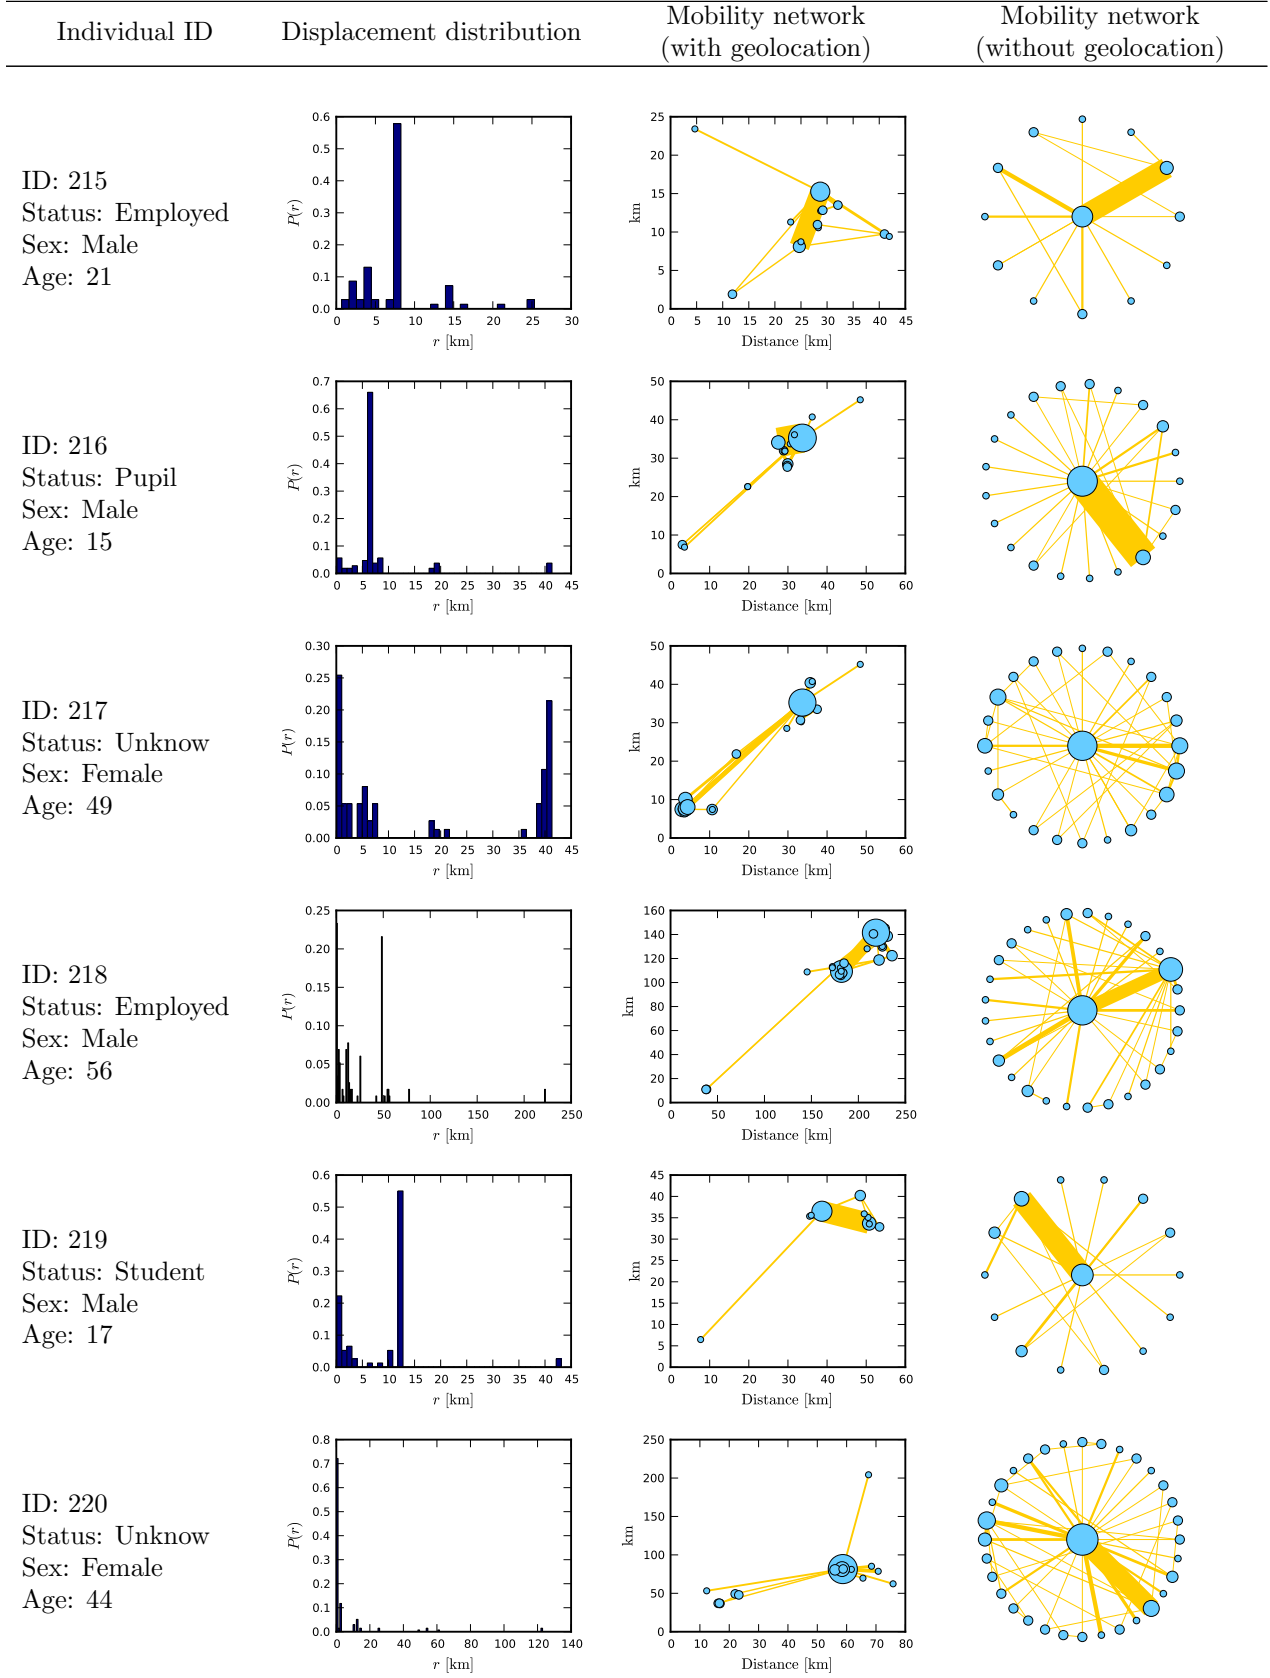

TABLE S1 (continued)

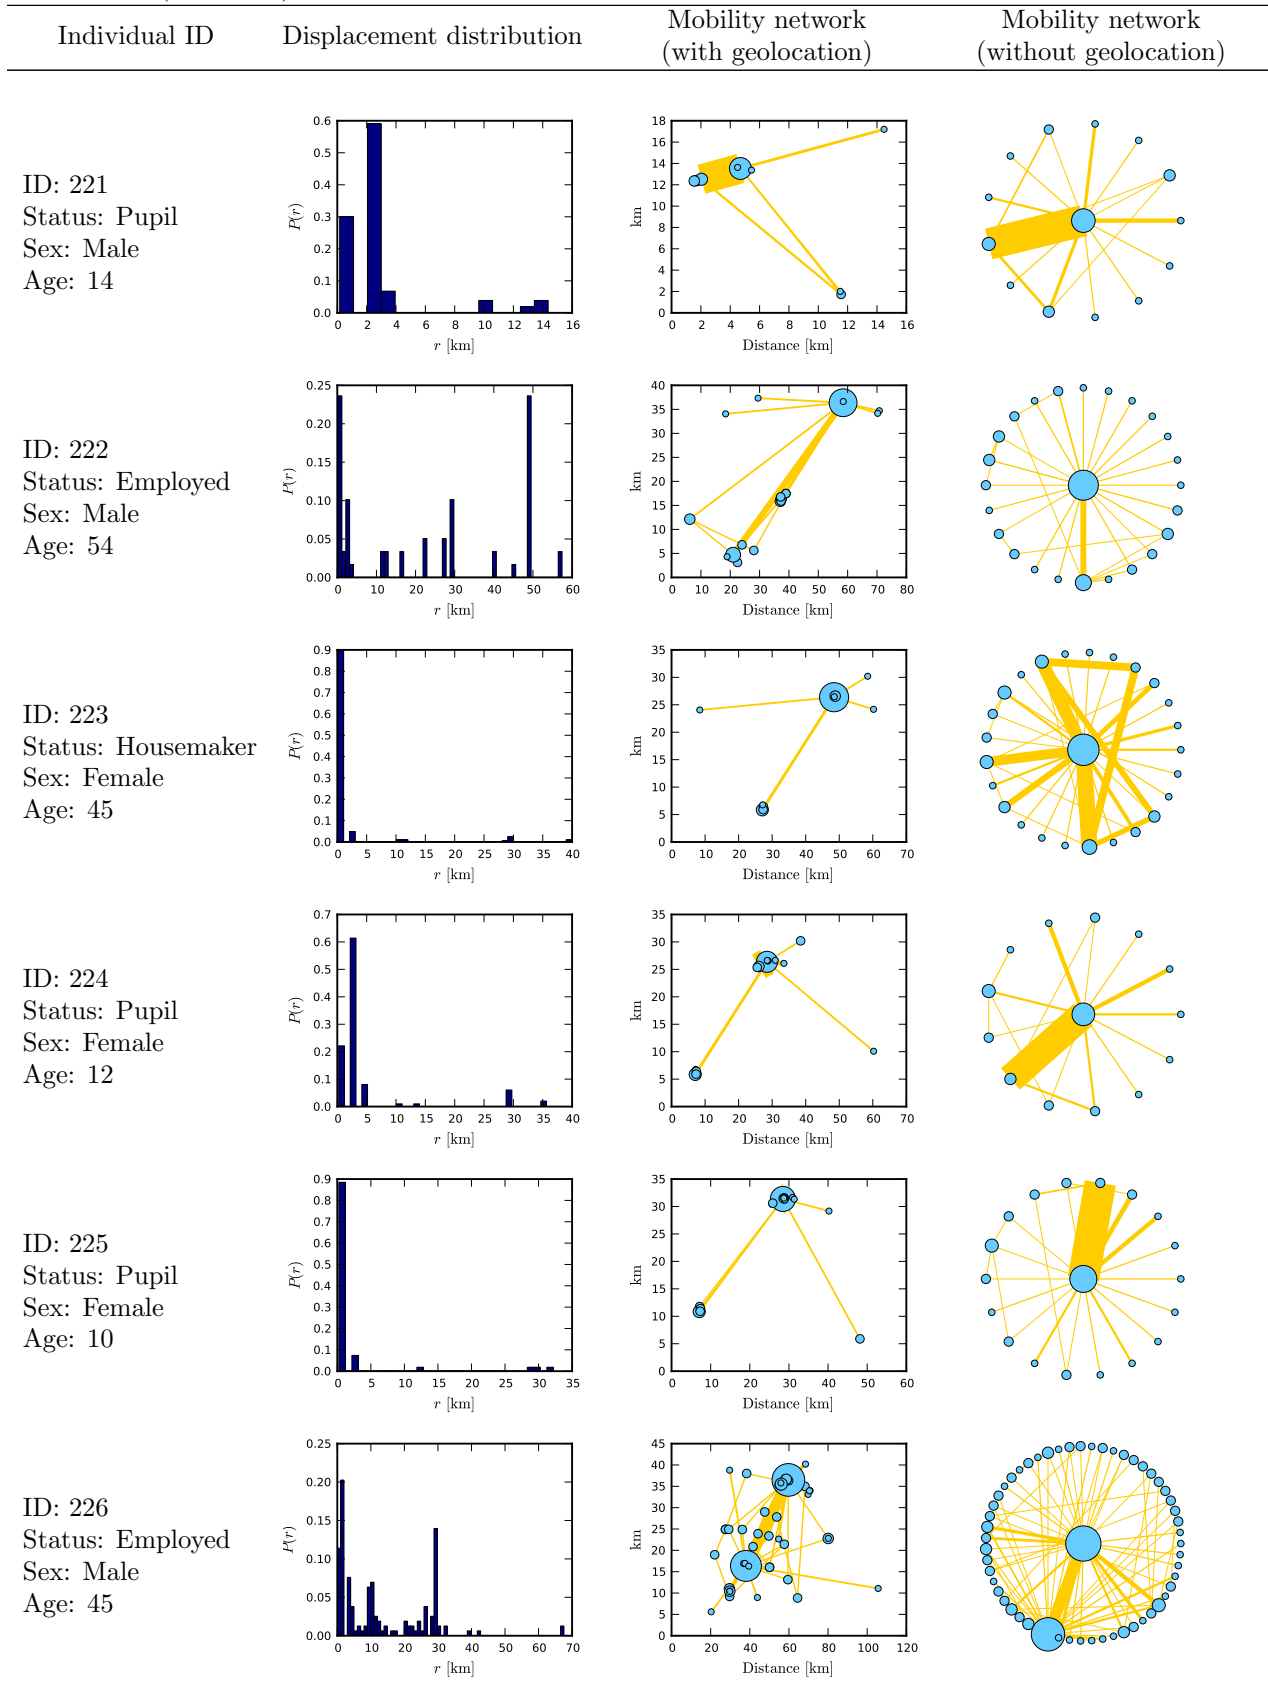

TABLE S1 (continued)

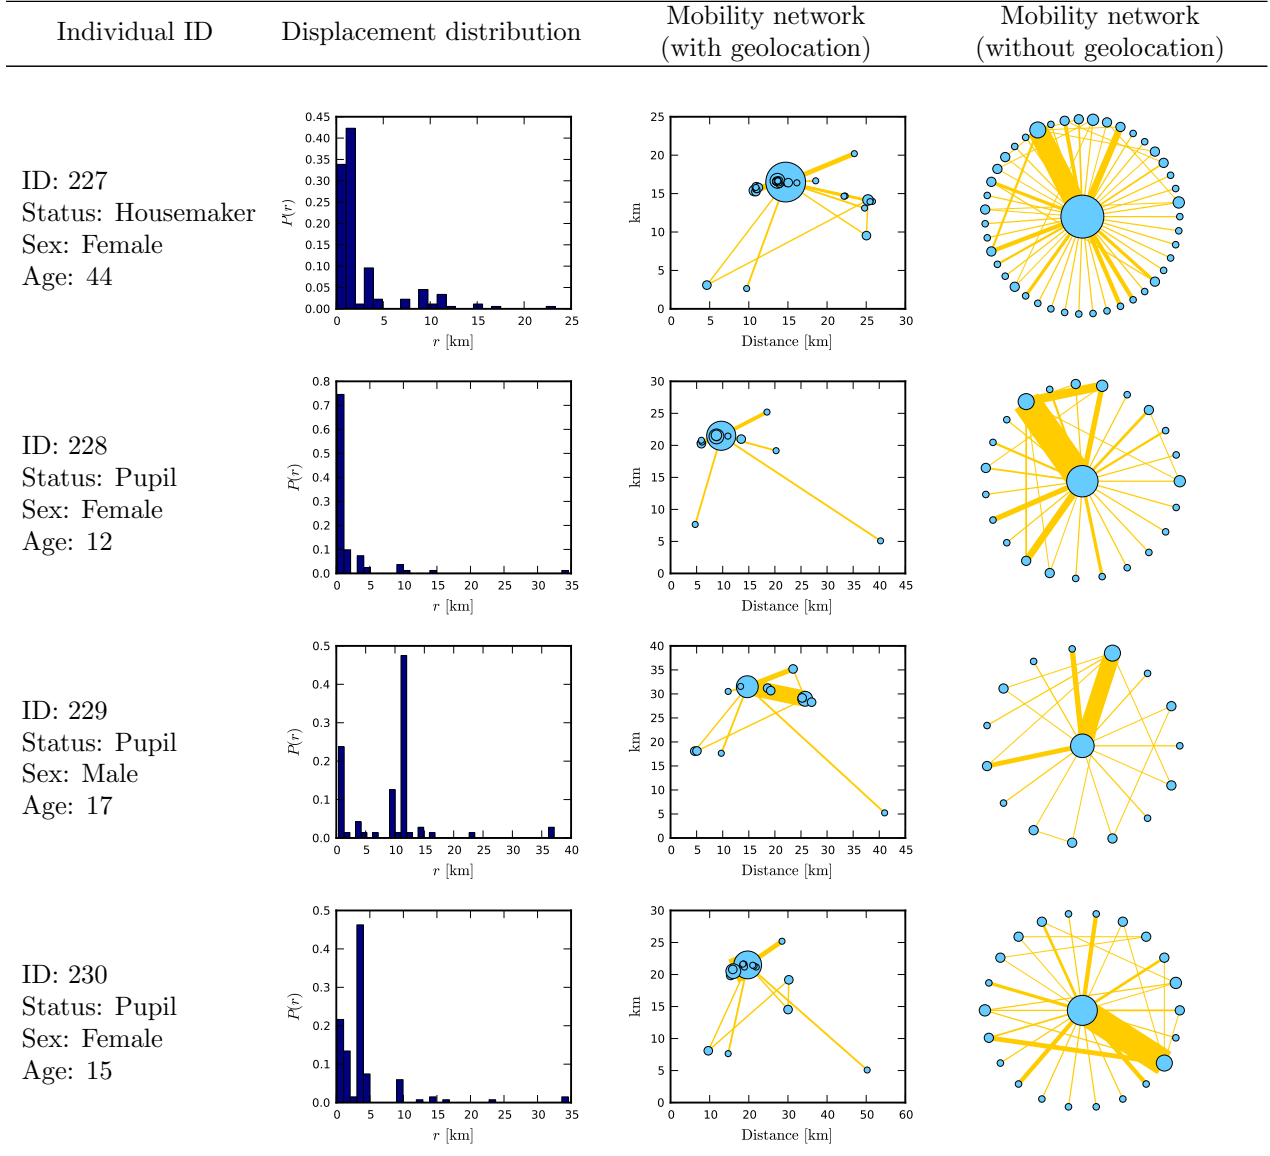

Table S2: Tests of power-law displacement distributions for all individuals by the method proposed by Clauset, Shalizi and Newman in *SIAM Rev.* 2009. For each individual, we show its ID, number of displacements ( $n$ ), lower bound to the power-law behavior ( $x_{min}$ ), number of displacements observed in the power-law region ( $n_{tail}$ ), estimated power exponent ( $\alpha$ ), likelihood ratio for the fit to the power law (LR) and  $p$ -value for the fit to the power law ( $p$ ). 202 individuals'  $p$ -value are less than 0.1 and thus the hypothesis that their displacement distributions are power-law should be ruled out.

| ID | $n$ | $x_{min}$ | $n_{tail}$ | $\alpha$ | LR       | $p$   |
|----|-----|-----------|------------|----------|----------|-------|
| 1  | 149 | 0.807     | 111        | 1.892    | -224.328 | 0     |
| 2  | 217 | 0.118     | 217        | 1.269    | -844.284 | 0     |
| 3  | 241 | 0.656     | 214        | 1.886    | -391.122 | 0     |
| 4  | 103 | 0.993     | 32         | 1.722    | -86.564  | 0.111 |
| 5  | 156 | 0.993     | 70         | 1.641    | -209.945 | 0     |
| 6  | 220 | 0.301     | 198        | 2.098    | -122.193 | 0     |
| 7  | 179 | 8.465     | 103        | 2.649    | -333.988 | 0     |

TABLE S2 (continued)

| ID | $n$ | $x_{min}$ | $n_{tail}$ | $\alpha$ | LR       | $p$   |
|----|-----|-----------|------------|----------|----------|-------|
| 8  | 158 | 1.917     | 129        | 1.617    | -484.385 | 0     |
| 9  | 104 | 0.393     | 102        | 1.302    | -466.731 | 0     |
| 10 | 148 | 0.475     | 48         | 1.574    | -122.57  | 0.075 |
| 11 | 139 | 2.457     | 112        | 1.579    | -467.371 | 0     |
| 12 | 83  | 2.023     | 81         | 1.568    | -326.533 | 0     |
| 13 | 80  | 4.394     | 64         | 2.569    | -170.665 | 0.198 |
| 14 | 84  | 7.174     | 12         | 11.462   | -8.62    | 0     |
| 15 | 123 | 5.82      | 106        | 2.336    | -341.359 | 0     |
| 16 | 183 | 0.514     | 153        | 1.83     | -264.13  | 0     |
| 17 | 84  | 0.571     | 74         | 1.564    | -206.086 | 0     |
| 18 | 153 | 0.696     | 133        | 1.664    | -339.642 | 0.005 |
| 19 | 162 | 0.013     | 162        | 1.193    | -561.739 | 0     |
| 20 | 154 | 0.107     | 153        | 1.48     | -242.628 | 0     |
| 21 | 126 | 9.417     | 78         | 2.065    | -321.233 | 0     |
| 22 | 147 | 2.533     | 47         | 1.879    | -150.203 | 0.002 |
| 23 | 235 | 3.156     | 140        | 2.218    | -388.206 | 0     |
| 24 | 235 | 0.097     | 216        | 1.36     | -534.352 | 0     |
| 25 | 146 | 0.2       | 146        | 1.416    | -389.584 | 0     |
| 26 | 176 | 0.396     | 163        | 1.502    | -449.2   | 0     |
| 27 | 126 | 7.032     | 84         | 1.893    | -351.422 | 0     |
| 28 | 322 | 0.401     | 164        | 1.772    | -268.75  | 0     |
| 29 | 78  | 8.197     | 34         | 2.544    | -112.796 | 0.229 |
| 30 | 94  | 0.288     | 94         | 1.342    | -352.574 | 0     |
| 31 | 70  | 8.197     | 32         | 2.473    | -108.661 | 0.196 |
| 32 | 127 | 4.658     | 94         | 2.002    | -332.217 | 0     |
| 33 | 177 | 1.974     | 52         | 1.595    | -201.749 | 0     |
| 34 | 149 | 2.014     | 45         | 1.62     | -170.552 | 0     |
| 35 | 179 | 2.353     | 152        | 2.524    | -317.719 | 0     |
| 36 | 223 | 0.849     | 99         | 1.728    | -250.365 | 0     |
| 37 | 103 | 0.14      | 103        | 1.575    | -136.346 | 0     |
| 38 | 175 | 3.392     | 87         | 2.867    | -185.547 | 0.076 |
| 39 | 113 | 0.114     | 112        | 1.303    | -372.037 | 0     |
| 40 | 172 | 0.234     | 172        | 1.388    | -528.362 | 0     |
| 41 | 285 | 1.988     | 140        | 2.634    | -253.15  | 0     |
| 42 | 275 | 0.53      | 208        | 1.71     | -440.309 | 0     |
| 43 | 319 | 1.235     | 140        | 2.109    | -281.291 | 0     |
| 44 | 141 | 1.168     | 140        | 2.958    | -139.104 | 0.116 |
| 45 | 96  | 0.575     | 91         | 1.649    | -220.062 | 0     |
| 46 | 226 | 1.13      | 125        | 2.304    | -202.938 | 0.036 |
| 47 | 147 | 1.152     | 52         | 1.662    | -159.317 | 0.194 |
| 48 | 109 | 0.456     | 109        | 1.313    | -498.751 | 0     |
| 49 | 136 | 1.152     | 124        | 1.814    | -319.409 | 0     |
| 50 | 106 | 0.93      | 100        | 1.431    | -409.056 | 0     |
| 51 | 115 | 2.943     | 99         | 2.641    | -217.15  | 0     |
| 52 | 136 | 1.865     | 42         | 1.63     | -154.335 | 0.007 |
| 53 | 125 | 1.346     | 54         | 1.62     | -182.933 | 0.038 |
| 54 | 89  | 5.807     | 60         | 1.851    | -245.753 | 0     |
| 55 | 202 | 2.286     | 167        | 2.849    | -292.81  | 0     |
| 56 | 202 | 2.717     | 98         | 2.202    | -259.483 | 0     |
| 57 | 96  | 2.692     | 94         | 1.769    | -333.881 | 0     |
| 58 | 89  | 1.417     | 45         | 1.498    | -182.524 | 0     |
| 59 | 87  | 0.206     | 87         | 1.249    | -420.526 | 0     |



TABLE S2 (continued)

| ID  | $n$ | $x_{min}$ | $n_{tail}$ | $\alpha$ | LR       | $p$   |
|-----|-----|-----------|------------|----------|----------|-------|
| 60  | 134 | 8.12      | 107        | 2.323    | -382.011 | 0     |
| 61  | 97  | 1.785     | 19         | 1.544    | -76.519  | 0.420 |
| 62  | 89  | 0.047     | 89         | 1.189    | -434.104 | 0     |
| 63  | 162 | 0.644     | 151        | 2.454    | -131.757 | 0     |
| 64  | 239 | 1.711     | 80         | 1.963    | -209.128 | 0.231 |
| 65  | 160 | 0.702     | 62         | 1.966    | -106.386 | 0     |
| 66  | 149 | 3.337     | 23         | 1.781    | -85.844  | 0.835 |
| 67  | 106 | 0.887     | 101        | 1.616    | -301.644 | 0     |
| 68  | 140 | 1.98      | 52         | 1.722    | -176.461 | 0     |
| 69  | 171 | 1.962     | 65         | 1.66     | -234.237 | 0.001 |
| 70  | 190 | 0.18      | 190        | 1.309    | -703.822 | 0     |
| 71  | 179 | 8.563     | 102        | 2.921    | -307.523 | 0.020 |
| 72  | 84  | 1.346     | 72         | 1.87     | -186.244 | 0     |
| 73  | 82  | 1.4       | 66         | 1.819    | -181.962 | 0     |
| 74  | 229 | 0.269     | 227        | 2.587    | 32.735   | 0     |
| 75  | 111 | 2.898     | 110        | 2.615    | -242.417 | 0     |
| 76  | 253 | 0.221     | 247        | 1.481    | -568.343 | 0     |
| 77  | 206 | 0.292     | 206        | 1.403    | -651.177 | 0     |
| 78  | 174 | 0.223     | 174        | 1.6      | -292.147 | 0     |
| 79  | 187 | 0.093     | 187        | 1.292    | -612.454 | 0     |
| 80  | 153 | 0.716     | 147        | 1.866    | -288.772 | 0     |
| 81  | 165 | 2.329     | 121        | 2.313    | -282.498 | 0     |
| 82  | 139 | 0.202     | 133        | 2.243    | 1.67     | 0     |
| 83  | 138 | 0.166     | 136        | 1.851    | -73.857  | 0     |
| 84  | 142 | 1.115     | 44         | 2.328    | -69.404  | 0.147 |
| 85  | 86  | 1.034     | 83         | 1.897    | -187.263 | 0     |
| 86  | 62  | 1.21      | 59         | 2.156    | -112.711 | 0     |
| 87  | 111 | 1.164     | 106        | 1.964    | -235.807 | 0     |
| 88  | 140 | 1.555     | 129        | 1.575    | -481.662 | 0     |
| 89  | 120 | 0.546     | 120        | 1.651    | -283.385 | 0     |
| 90  | 105 | 1.453     | 36         | 1.672    | -117.391 | 0     |
| 91  | 224 | 0.175     | 224        | 1.323    | -781.679 | 0     |
| 92  | 153 | 0.251     | 140        | 1.604    | -248.967 | 0     |
| 93  | 120 | 0.732     | 114        | 2.082    | -174.783 | 0     |
| 94  | 243 | 0.236     | 243        | 1.491    | -559.569 | 0     |
| 95  | 127 | 0.174     | 127        | 1.33     | -429.778 | 0     |
| 96  | 91  | 2.43      | 85         | 1.832    | -278.266 | 0     |
| 97  | 82  | 0.468     | 82         | 1.373    | -320.628 | 0     |
| 98  | 223 | 10.593    | 44         | 2.179    | -177.921 | 0.720 |
| 99  | 208 | 1.261     | 68         | 1.703    | -204.536 | 0.024 |
| 100 | 142 | 0.465     | 141        | 1.312    | -648.763 | 0     |
| 101 | 281 | 0.828     | 272        | 1.724    | -684.254 | 0     |
| 102 | 166 | 0.491     | 82         | 1.715    | -165.783 | 0.001 |
| 103 | 163 | 3.243     | 102        | 2.041    | -315.819 | 0     |
| 104 | 124 | 3.437     | 105        | 1.569    | -478.359 | 0     |
| 105 | 148 | 0.468     | 148        | 1.539    | -401.444 | 0     |
| 106 | 190 | 1.608     | 180        | 1.664    | -610.003 | 0     |
| 107 | 168 | 4.882     | 105        | 2.51     | -297.73  | 0     |
| 108 | 140 | 0.253     | 54         | 1.37     | -179.733 | 0.002 |
| 109 | 131 | 0.082     | 131        | 1.212    | -626.803 | 0     |
| 110 | 160 | 0.404     | 155        | 1.91     | -199.38  | 0     |
| 111 | 138 | 0.298     | 134        | 1.343    | -506.351 | 0     |

TABLE S2 (continued)

| ID  | $n$ | $x_{min}$ | $n_{tail}$ | $\alpha$ | LR       | $p$   |
|-----|-----|-----------|------------|----------|----------|-------|
| 112 | 129 | 0.282     | 125        | 1.328    | -487.717 | 0     |
| 113 | 153 | 2.296     | 132        | 1.47     | -622.015 | 0     |
| 114 | 167 | 3.998     | 147        | 1.993    | -499.673 | 0     |
| 115 | 143 | 0.486     | 140        | 1.326    | -624.553 | 0     |
| 116 | 146 | 0.406     | 145        | 1.433    | -471.056 | 0     |
| 117 | 173 | 1.907     | 29         | 1.875    | -84.745  | 0.711 |
| 118 | 177 | 0.807     | 158        | 2.566    | -154.008 | 0     |
| 119 | 191 | 8.997     | 123        | 2.283    | -458.465 | 0     |
| 120 | 105 | 17.743    | 33         | 1.789    | -177.534 | 0.074 |
| 121 | 139 | 14.268    | 29         | 2.433    | -115.895 | 0.449 |
| 122 | 53  | 0.185     | 53         | 1.656    | -66.755  | 0     |
| 123 | 127 | 0.938     | 76         | 2.775    | -70.322  | 0.209 |
| 124 | 163 | 0.129     | 163        | 1.304    | -558.206 | 0     |
| 125 | 159 | 9.936     | 71         | 2.753    | -234.674 | 0.322 |
| 126 | 183 | 0.292     | 161        | 1.626    | -295.128 | 0     |
| 127 | 131 | 4.525     | 118        | 2.184    | -375.849 | 0     |
| 128 | 127 | 4.413     | 125        | 2.32     | -370.508 | 0     |
| 129 | 84  | 8.485     | 60         | 2.431    | -208.74  | 0.084 |
| 130 | 98  | 8.555     | 31         | 2.247    | -115.551 | 0.374 |
| 131 | 101 | 1.945     | 93         | 2.436    | -185.983 | 0     |
| 132 | 84  | 1.285     | 75         | 1.742    | -217.241 | 0     |
| 133 | 174 | 3.824     | 42         | 2.528    | -108.027 | 0.137 |
| 134 | 167 | 2.943     | 50         | 1.971    | -156.886 | 0     |
| 135 | 92  | 1.017     | 91         | 1.74     | -243.012 | 0     |
| 136 | 145 | 7.531     | 109        | 2.078    | -422.025 | 0     |
| 137 | 61  | 0.114     | 61         | 1.326    | -183.966 | 0     |
| 138 | 82  | 0.676     | 78         | 1.336    | -364.318 | 0     |
| 139 | 219 | 1.403     | 164        | 1.829    | -448.258 | 0     |
| 140 | 78  | 1.119     | 63         | 1.688    | -185.146 | 0.063 |
| 141 | 163 | 1.587     | 102        | 2.123    | -228.089 | 0     |
| 142 | 230 | 0.639     | 190        | 2.687    | -118.158 | 0     |
| 143 | 263 | 1.36      | 27         | 1.531    | -103.314 | 0.937 |
| 144 | 126 | 0.16      | 126        | 1.278    | -508.537 | 0     |
| 145 | 173 | 0.586     | 169        | 3.043    | -40.585  | 0.033 |
| 146 | 104 | 0.586     | 99         | 1.375    | -406.922 | 0     |
| 147 | 110 | 0.432     | 107        | 1.638    | -233.129 | 0     |
| 148 | 103 | 0.591     | 94         | 2.05     | -129.455 | 0     |
| 149 | 117 | 0.593     | 111        | 1.579    | -305.281 | 0     |
| 150 | 110 | 0.43      | 99         | 2.272    | -69.387  | 0     |
| 151 | 266 | 2.139     | 201        | 2.441    | -419.822 | 0     |
| 152 | 152 | 0.356     | 149        | 1.485    | -409.874 | 0     |
| 153 | 109 | 0.704     | 106        | 1.543    | -328.554 | 0     |
| 154 | 175 | 1.284     | 175        | 1.504    | -686.309 | 0     |
| 155 | 119 | 1.776     | 116        | 1.587    | -441.793 | 0     |
| 156 | 260 | 0.424     | 98         | 1.74     | -175.66  | 0     |
| 157 | 249 | 6.346     | 97         | 2.347    | -319.321 | 0.127 |
| 158 | 190 | 2.319     | 60         | 2.021    | -167.969 | 0.006 |
| 159 | 159 | 1.102     | 144        | 1.889    | -336.909 | 0     |
| 160 | 135 | 0.732     | 135        | 2.16     | -189.395 | 0     |
| 161 | 154 | 0.74      | 70         | 2.069    | -109.763 | 0.066 |
| 162 | 167 | 25.919    | 23         | 2.219    | -112.172 | 0.362 |
| 163 | 138 | 0.491     | 126        | 1.518    | -362.678 | 0     |

TABLE S2 (continued)

| ID  | $n$ | $x_{min}$ | $n_{tail}$ | $\alpha$ | LR       | $p$   |
|-----|-----|-----------|------------|----------|----------|-------|
| 164 | 222 | 4.029     | 25         | 1.951    | -87.378  | 0.137 |
| 165 | 131 | 11.083    | 22         | 1.83     | -105.513 | 0.278 |
| 166 | 149 | 11.861    | 21         | 1.81     | -103.296 | 0.041 |
| 167 | 181 | 0.152     | 181        | 1.364    | -521.499 | 0     |
| 168 | 136 | 6.298     | 97         | 2.673    | -283.568 | 0.004 |
| 169 | 158 | 0.072     | 158        | 1.305    | -449.187 | 0     |
| 170 | 174 | 2.45      | 140        | 1.618    | -559.258 | 0     |
| 171 | 154 | 2.45      | 136        | 2.504    | -292.781 | 0     |
| 172 | 229 | 2.312     | 177        | 3.059    | -283.474 | 0.045 |
| 173 | 207 | 0.376     | 207        | 1.549    | -505.788 | 0     |
| 174 | 165 | 1.919     | 122        | 1.557    | -491.767 | 0     |
| 175 | 95  | 5.61      | 34         | 1.879    | -135.733 | 0.250 |
| 176 | 186 | 0.305     | 186        | 1.408    | -587.387 | 0     |
| 177 | 145 | 0.145     | 145        | 1.289    | -546.793 | 0     |
| 178 | 143 | 0.904     | 142        | 1.613    | -428.888 | 0     |
| 179 | 130 | 4.069     | 92         | 2.288    | -269.271 | 0     |
| 180 | 137 | 0.098     | 137        | 1.298    | -443.824 | 0     |
| 181 | 179 | 1.663     | 158        | 1.502    | -661.758 | 0     |
| 182 | 182 | 5.526     | 116        | 2.125    | -403.762 | 0     |
| 183 | 104 | 7.157     | 98         | 2.455    | -321.492 | 0.001 |
| 184 | 116 | 0.228     | 116        | 1.333    | -420.482 | 0     |
| 185 | 109 | 1.51      | 106        | 1.542    | -410.272 | 0     |
| 186 | 176 | 2.272     | 148        | 1.78     | -495.862 | 0     |
| 187 | 108 | 6.807     | 40         | 1.612    | -201.688 | 0.685 |
| 188 | 93  | 0.069     | 93         | 1.233    | -379.879 | 0     |
| 189 | 167 | 6.041     | 22         | 2.297    | -72.823  | 0.481 |
| 190 | 158 | 7.93      | 25         | 2.448    | -84.775  | 0.450 |
| 191 | 199 | 6.37      | 120        | 2.801    | -338.226 | 0     |
| 192 | 320 | 4.988     | 229        | 1.988    | -831.541 | 0     |
| 193 | 176 | 0.855     | 172        | 1.9      | -354.116 | 0     |
| 194 | 225 | 0.129     | 219        | 1.422    | -479.023 | 0     |
| 195 | 141 | 0.107     | 141        | 1.318    | -432.28  | 0     |
| 196 | 150 | 0.15      | 41         | 1.478    | -79.244  | 0     |
| 197 | 186 | 0.063     | 186        | 1.274    | -591.557 | 0     |
| 198 | 109 | 1.649     | 94         | 1.77     | -287.761 | 0     |
| 199 | 191 | 2.826     | 112        | 2.342    | -278.9   | 0.006 |
| 200 | 117 | 4.909     | 65         | 2.29     | -202.281 | 0.002 |
| 201 | 259 | 0.335     | 230        | 1.556    | -527.254 | 0     |
| 202 | 84  | 2.154     | 62         | 2.774    | -108.964 | 0.519 |
| 203 | 70  | 1.204     | 53         | 2.225    | -95.345  | 0.009 |
| 204 | 123 | 3.654     | 34         | 1.622    | -148.917 | 0.017 |
| 205 | 168 | 9.229     | 54         | 2.714    | -176.416 | 0.359 |
| 206 | 68  | 0.063     | 68         | 1.23     | -276.691 | 0     |
| 207 | 109 | 0.109     | 109        | 1.363    | -277.66  | 0     |
| 208 | 144 | 2.855     | 108        | 1.883    | -357.145 | 0     |
| 209 | 183 | 3.038     | 137        | 2.591    | -311.808 | 0.001 |
| 210 | 124 | 0.833     | 123        | 1.746    | -301.323 | 0     |
| 211 | 209 | 2.619     | 136        | 2.936    | -247.31  | 0.014 |
| 212 | 132 | 0.13      | 132        | 1.292    | -477.117 | 0     |
| 213 | 143 | 2.015     | 63         | 1.484    | -283.083 | 0     |
| 214 | 125 | 0.125     | 125        | 1.255    | -526.162 | 0     |
| 215 | 73  | 2.463     | 71         | 1.947    | -213.873 | 0     |

TABLE S2 (continued)

| ID  | $n$ | $x_{min}$ | $n_{tail}$ | $\alpha$ | LR       | $p$ |
|-----|-----|-----------|------------|----------|----------|-----|
| 216 | 108 | 3.44      | 98         | 2.347    | -262.678 | 0   |
| 217 | 76  | 0.584     | 69         | 1.373    | -284.705 | 0   |
| 218 | 116 | 6.904     | 71         | 1.717    | -330.822 | 0   |
| 219 | 78  | 0.075     | 78         | 1.257    | -285.52  | 0   |
| 220 | 137 | 0.075     | 137        | 1.486    | -163.453 | 0   |
| 221 | 109 | 0.159     | 109        | 1.425    | -257.713 | 0   |
| 222 | 60  | 0.185     | 60         | 1.271    | -258.767 | 0   |
| 223 | 204 | 0.084     | 204        | 1.691    | -70.44   | 0   |
| 224 | 101 | 0.232     | 101        | 1.438    | -267.286 | 0   |
| 225 | 112 | 0.232     | 112        | 2.21     | -19.559  | 0   |
| 226 | 159 | 7.275     | 88         | 2.035    | -344.681 | 0   |
| 227 | 183 | 0.66      | 167        | 2.007    | -262.051 | 0   |
| 228 | 165 | 0.166     | 165        | 1.539    | -276.144 | 0   |
| 229 | 74  | 0.382     | 74         | 1.367    | -278.325 | 0   |
| 230 | 136 | 0.291     | 135        | 1.455    | -371.506 | 0   |

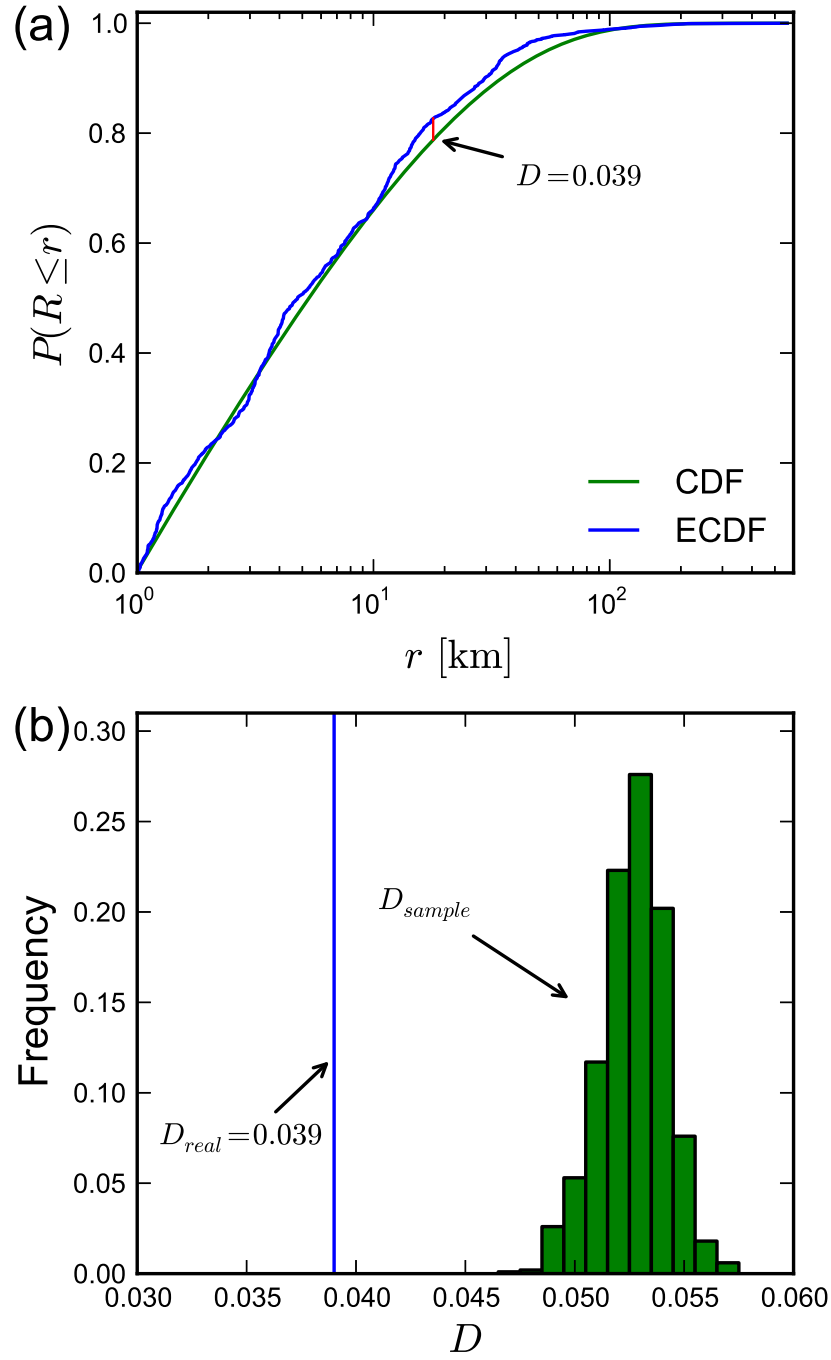

Figure S1: Kolmogorov-Smirnov test results. **a.** Illustration of the standard KS distance. Green line is the cumulative density function (CDF) of the fitting function, blue line is the empirical cumulative density function (ECDF) of the observed data, and the red line is the standard KS distance (the maximum gap between CDF and ECDF). **b.** KS distance distribution of the sampled data sets. The data sets are independently sampled from the fitting function for 1000 times. In all cases the KS distances of the sampled data ( $D_{sample}$ ) are larger than the KS distance of the real data ( $D_{real}$ ).

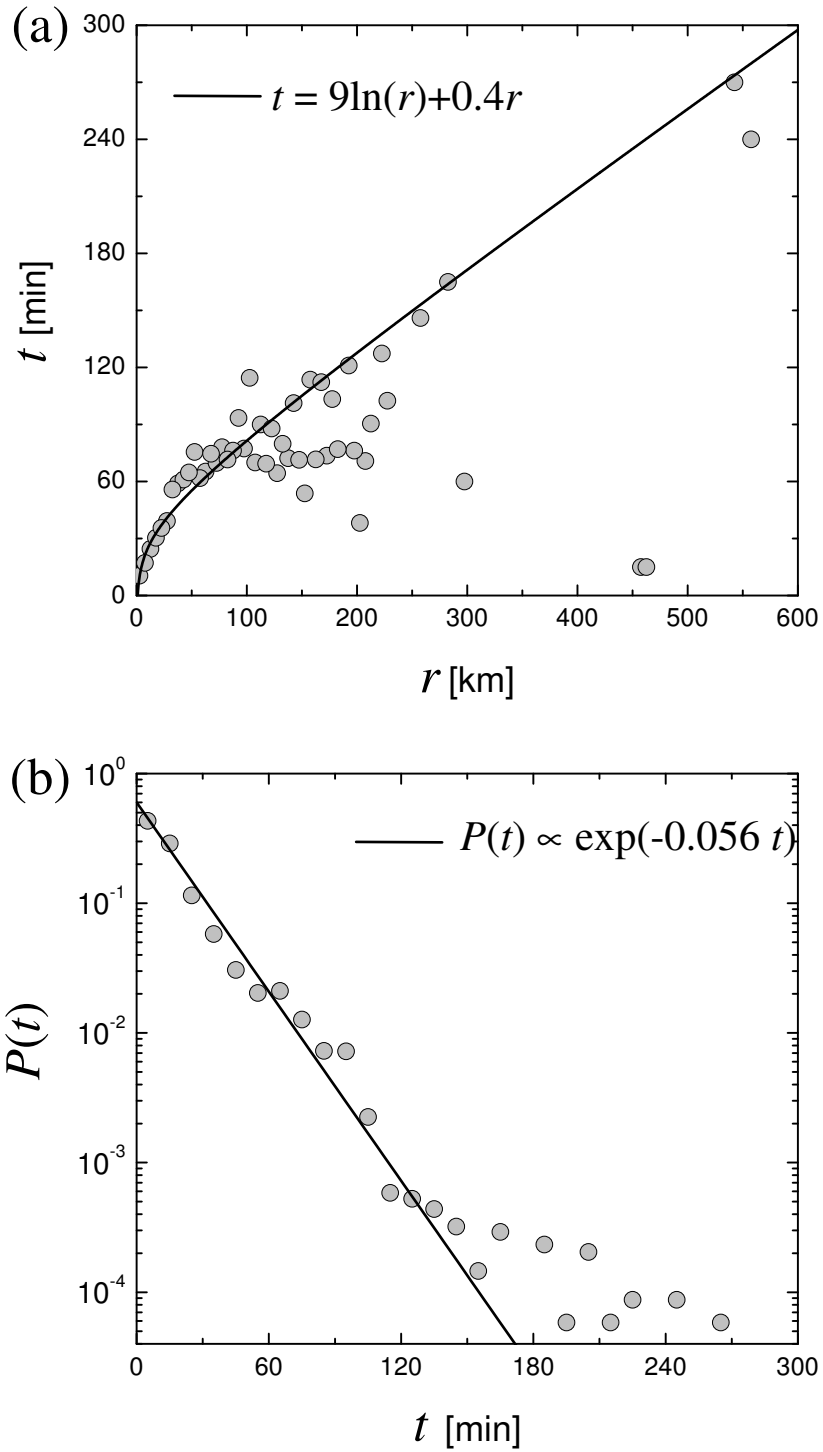

Figure S2: Statistical features of travel time in the aggregated data. **a.** The relationship between travel time  $t$  and distance  $r$ , which can be approximately fitted by a hybrid form consisting of a logarithmic term and a linear term. A few data points are not believable, for example, it is not possible to travel along more than 450 kilometers within 15 minutes. **b.** Travel time distribution at the aggregated level, which decays exponentially in the first half.

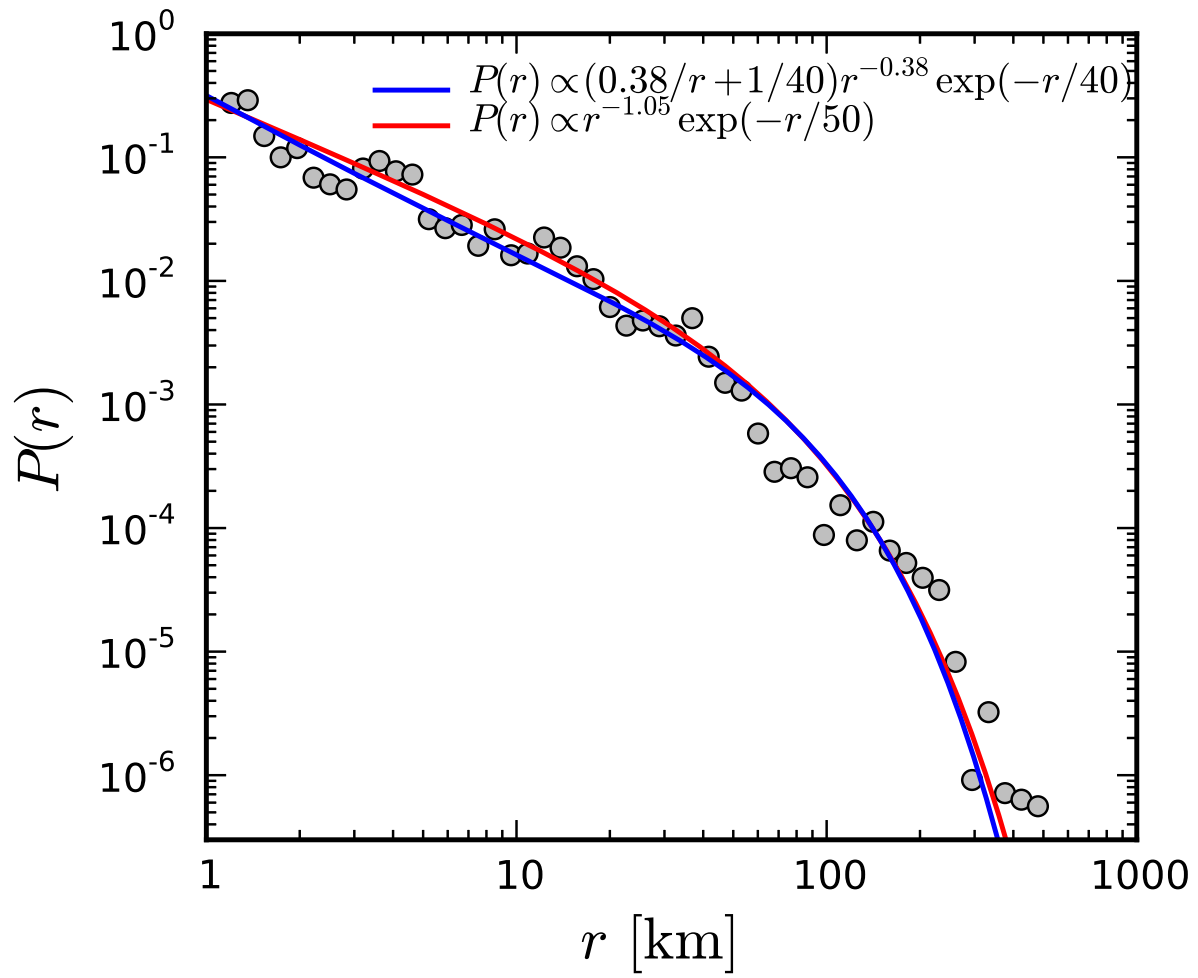

Figure S3: Comparison of the fitting potential of various probability density functions (red line and blue line) to the aggregated displacement distribution data. The data were binned using logarithmic binning method.

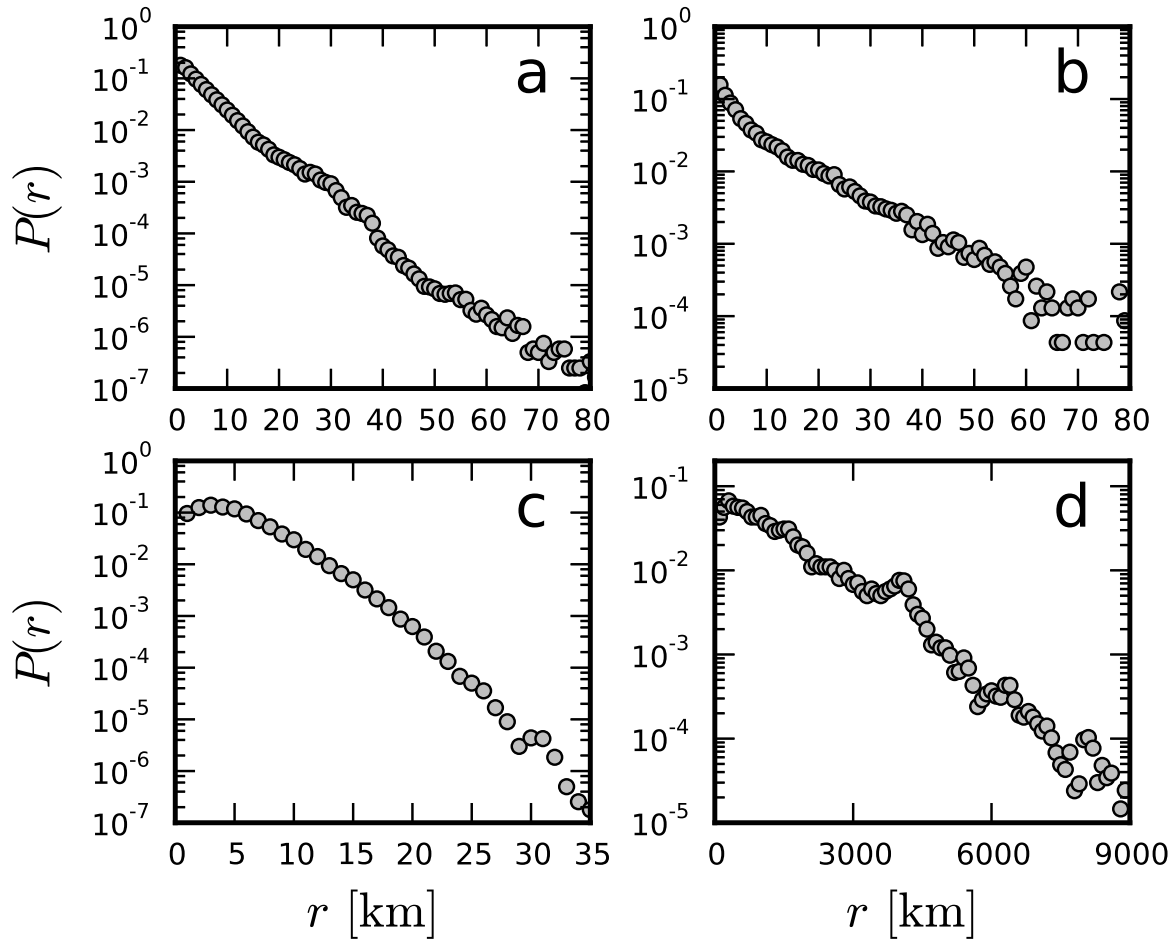

Figure S4: Displacement distributions for single mode of transportation (using probability density distribution). **a.** 12,028,929 taxi passenger trajectories in Beijing. **b.** 46,541 car trips in Detroit. **c.** 783,210 bus trips in Shijiazhuang. **d.** 205,534 air-flight passenger travels in US.



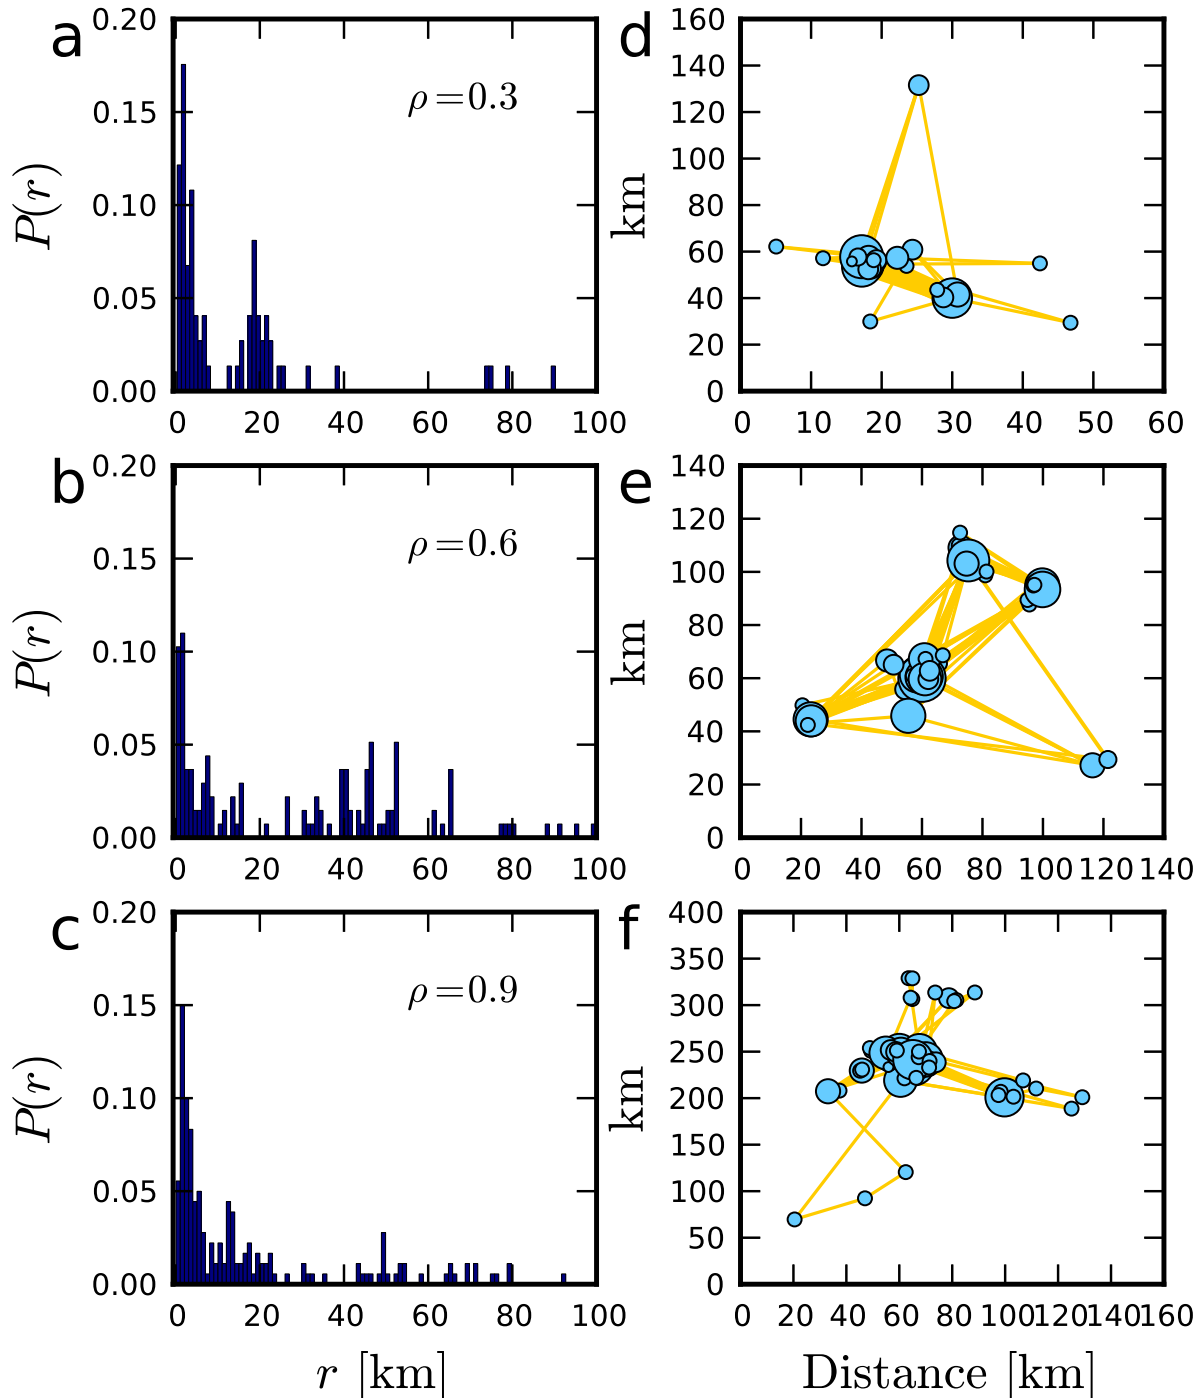

Figure S5: Individual mobility patterns generated by exploration and preferential return model proposed by Song, Koren, Wang and Barabási in *Nat. Phys.* **6**, 818 2010. **a-c.** Displacement distributions for three simulative individuals.  $\rho$  is a parameter to characterize the individual's preference of exploration new locations. **d-f.** Mobility networks for the three individuals, where the area of a node is proportional to its number of visits and the width of an edge is proportional to its weight.
